1 **SETD1B controls cognitive function via cell type specific regulation of neuronal identity**  
2 **genes.**

3  
4 Alexandra Michurina<sup>1\*</sup>, Sadman Sakib<sup>1\*</sup>, Cemil Kerimoglu<sup>1\*\$</sup>, Dennis Manfred Krüger<sup>1</sup>, Lalit  
5 Kaurani<sup>1</sup>, Rezaul Islam<sup>1</sup>, Tonatiuh Pena Centeno<sup>1</sup>, Julia Cha<sup>1</sup>, Xingbo Xu<sup>2</sup>, Elisabeth M.  
6 Zeisberg<sup>2,3,4</sup> Andrea Kranz<sup>5</sup>, Francis Adrian Stewart<sup>5,6</sup>, Andre Fischer<sup>1,4,6,7, \$</sup>

7  
8 <sup>1</sup>Department for Systems Medicine and Epigenetics, German Center for Neurodegenerative Diseases  
9 (DZNE), Von Siebold Str. 3a, 37075, Göttingen, Germany

10 <sup>2</sup> Department of Cardiology and Pneumology, University Medical Center of Göttingen, Georg-August  
11 University, Germany, Robert Koch Str. 40, 37075 Göttingen, Germany

12 <sup>3</sup> German Centre for Cardiovascular Research (DZHK), Partner Site Göttingen, Germany

13 <sup>4</sup>Cluster of Excellence "Multiscale Bioimaging: from Molecular Machines to Networks of Excitable  
14 Cells" (MBExC), University of Göttingen, Germany

15 <sup>5</sup>Biotechnology Center, Center for Molecular and Cellular Bioengineering, Dresden University of  
16 Technology, Dresden 01307, Germany

17 <sup>6</sup> Max-Planck-Institute for Cell Biology and Genetics, Dresden, 01307, Germany

18 <sup>7</sup>Department of Psychiatry and Psychotherapy, University Medical Center Göttingen, Von Siebold Str  
19 5, 37075 Göttingen, Germany

20  
21 §Corresponding authors: [cemil.kerimoglu@dzne.de](mailto:cemil.kerimoglu@dzne.de); [andre.fischer@dzne.de](mailto:andre.fischer@dzne.de)

22 \* equal contribution

23  
24 Short title: *Setd1b* regulates cognition

25 **ABSTRACT**

26 Histone-3-lysine-4-methylation (H3K4me) is mediated by six different lysine  
27 methyltransferases (KMTs). Amongst these enzymes SET domain containing 1b (SETD1B)  
28 has been linked to intellectual disability but its role in the adult brain has not been studied yet.  
29 Here we show that mice lacking *Setd1b* from excitatory neurons of the adult forebrain exhibit  
30 severe memory impairment. By combining neuron-specific ChIP-seq, RNA-seq and single  
31 cell RNA-seq approaches we show that *Setd1b* controls the expression of neuronal-identity  
32 genes with a broad H3K4me3 peak linked to learning and memory processes. Our data  
33 furthermore suggest that basal neuronal gene-expression is ensured by other H3K4 KMTs  
34 such as *Kmt2a* and *Kmt2b* while the additional presence of *Setd1b* at the single cell level  
35 provides transcriptional consistency to the expression of genes important for learning &  
36 memory.

37  
38 Keywords: histone-methylation, learning & memory, ChIP-seq, cognitive diseases

39  
40

## 41 INTRODUCTION

42

43 Cognitive diseases are a heterogeneous group of disorders that depend on complex  
44 interactions of genetic and environmental factors that activate epigenetic processes (Fischer,  
45 2014). In addition, mutations in genes that control epigenetic gene-regulation are over-  
46 represented in cognitive diseases (Kleefstra *et al*, 2014). Therefore, targeting the epigenome  
47 has emerged as a promising therapeutic avenue to treat neurodegenerative and  
48 neuropsychiatric diseases (Nestler *et al*, 2015) (Fischer, 2014). To understand the regulation  
49 of epigenetic gene-expression in the adult brain is thus of utmost importance. Histone 3 lysine  
50 4 methylation (H3K4) is enriched around transcription start site (TSS) regions of actively  
51 transcribed genes when trimethylated (H3K4me3) (Guenther *et al*, 2006). In the human brain  
52 reduced H3K4me3 has been observed in cognitive diseases such as autism spectrum disorder  
53 (Shulha *et al*, 2012) or Alzheimer's disease (Gjoneska *et al*, 2015a) (Kerimoglu *et al*, 2017a).  
54 In mammals, H3K4 methylation is mediated by six different lysine-methyltransferases  
55 (KMT's), namely KMT2A (Mll1), KMT2B (Mll2), KMT2C (Mll3), KMT2D (Mll4),  
56 SETD1A, and SETD1B that catalyze mono-, di- and trimethylation (Shilatifard, 2012). The  
57 role of these enzymes in the adult brain is only beginning to emerge. Recent reports showed  
58 that *Kmt2a* and *Kmt2b* are required for hippocampus-dependent memory formation (Gupta *et*  
59 *al*, 2010) (Kerimoglu *et al*, 2013) (Kerimoglu *et al*, 2017b), while *Setd1a* has been linked to  
60 schizophrenia (Mukai *et al*, 2019; Singh T *et al*, 2016; Takata *et al*, 2016). *Setd1b* has been  
61 studied during development (Brici *et al*, 2017; Schmidt *et al*, 2018). Virtually nothing is  
62 known about the function of *Setd1b* in the adult brain, although mutations in *Setdb1* have  
63 been linked to intellectual disability (Hiraide *et al*, 2018; Labonne *et al*, 2016). To elucidate  
64 the role of *Setd1b* in the brain we generated mice that lack *Setd1b* from excitatory neurons of  
65 the adult forebrain. Our data reveal that *Setd1b* is essential for memory formation. Moreover,  
66 we provide evidence that *Setd1b* controls the expression of neuronal-identity genes that are  
67 characterized by a broad H3K4 trimethylation peak at the TSS, high expression levels and are  
68 intimately linked to learning and memory processes. Comparison of our data to those from  
69 other H3K4 KMTs suggest that this role is specific to *Setd1b* which provides to neurons  
70 transcriptional consistency to the expression of learning and memory genes.

71

## 72 RESULTS

### 73 *Loss of Setd1b in adult forebrain neurons impairs hippocampus-dependent memory* 74 *formation.*

75 To study the role of *Setd1b* in the adult brain, we crossed mice in which exon 5 of the *Setd1b*  
76 gene is flanked by loxP sites to mice that express CRE-recombinase under control of the  
77 CamKII promoter. This approach ensures deletion of *Setd1b* from excitatory forebrain

78 neurons of the adult brain (cKO mice). Quantitative PCR (qPCR) analysis confirmed  
79 decreased expression of *Setd1b* from the hippocampal Cornu Ammonis (CA) area, the dentate  
80 gyrus (DG) and the cortex when compared to corresponding control littermates that carry  
81 loxP sites but do not express CRE recombinase (control group). Expression in the cerebellum  
82 was not affected confirming the specificity of the approach (**Fig 1A**). Residual expression of  
83 *Setd1b* is most likely due to the fact that deletion is restricted to excitatory neurons while  
84 other cell types are unaffected. In line with the qPCR data, SETD1B protein levels were  
85 reduced in the hippocampal CA region of *Setd1b* cKO mice (**Fig 1B**). *Setd1b* cKO mice did  
86 not show any gross abnormalities in brain anatomy as evidenced by immunohistological  
87 analysis of DAPI staining, staining of marker-proteins for neuronal integrity Neuronal N  
88 (NEUN), microtubule-associated protein 2 (MAP2) as well as ionized calcium-binding  
89 adapter molecule 1 (IBA1) as a marker for microglia and glial fibrillary acidic protein  
90 (GFAP) as a marker for astrocytes (**Fig. 1C**). Next, we subjected *Setd1b* cKO and control  
91 mice to behavior testing. Notably, it was previously shown that heterozygous mice expressing  
92 CRE under control of the CamKII promoter do not differ from wild type littermates (Kuczera  
93 *et al*, 2010) (Stilling *et al*, 2014) and we have confirmed this in the context of the present  
94 study also for behavior testing (**Fig. S1**). There was no difference amongst groups in the open  
95 field test, suggesting that explorative behavior is normal in *Setd1b* cKO mice (**Fig 1D**). Short  
96 term memory was assayed via the T-maze and was also similar amongst groups (**Fig 1E**).  
97 Next, we subjected mice to the Morris Water Maze test to study hippocampus-dependent  
98 spatial memory. While control mice were able to learn the task as indicated by a reduced  
99 escape latency throughout the 10 days of training, *Setd1b* cKO mice were severely impaired  
100 (**Fig 1F**). We also performed a more sensitive analysis using a modified version of the  
101 MUST-C algorithm to measure the different spatial strategies that represent either  
102 hippocampus-dependent or independent abilities (Illouz *et al*, 2016). Our results indicate that  
103 *Setd1b* cKO mice fail to adapt hippocampus-dependent search strategies such as “direct”,  
104 “corrected” and “short-chaining” (**Fig 1G**). Consistently, the cumulative learning score  
105 calculated on the basis of these search strategies was severely impaired in *Setd1b* cKO mice  
106 (**Fig 1H**). To assess memory retrieval, a probe test was performed. *Setd1b* cKO mice were  
107 severely impaired during the probe test performed at the end of the training (**Fig 1I**). These  
108 data show that deletion of *Setd1b* from excitatory neurons of the adult forebrain leads to  
109 severe impairment of hippocampus-dependent learning and memory abilities.

110

### 111 *Setd1d* controls neuronal H3K4 methylation

112 To elucidate the molecular mechanisms by which *Setd1b* contributes to memory  
113 formation we decided to test its impact on epigenetic gene-expression in hippocampal  
114 neurons. To this end we isolated the hippocampal CA region from *Setd1b* cKO and control

115 mice and prepared nuclei using modified fixation protocols that allowed us to perform  
116 neuron-specific chromatin-immunoprecipitation (ChIP) to study histone-modifications and  
117 RNA-sequencing to assay gene-expression from the same samples (**Fig 2A, Fig S2**). Since  
118 SETD1B is a histone 3 lysine 4 (H3K4) methyltransferase we decided to analyze tri-  
119 methylation (H3K4me3) of histone 3 lysine 4 that is enriched at the transcription start site  
120 (TSS) of active genes and is associated with euchromatin and active gene-expression. H3K4  
121 methylation is believed to be a stepwise process and recent data suggest that the different  
122 methylation states (from mono- to tri-methylation) at the TSS of a gene form a gradient  
123 reflecting its specific transcriptional state (Choudhury *et al*, 2019; Soares *et al*, 2017). Thus,  
124 we also analyzed mono-methylation of histone 3 at lysine 4 (H3K4me1). In addition, we  
125 analyzed histone 3 lysine 9 acetylation (H3K9ac), an eu-chromatin mark that was shown to  
126 partially depend on H3K4 methylation (Kerimoglu *et al.*, 2013; Kerimoglu *et al.*, 2017b).  
127 Finally, we also performed Chip-seq for histone 3 lysine 27 acetylation (H3K27ac), another  
128 euchromatin mark that is linked to active gene-expression and marks promoter elements  
129 around the TSS but also enhancer regions and has not be directly linked to H3K4me3 in brain  
130 tissue. We observed that loss of *Setd1b* leads to a substantial decrease in neuronal H3K4me3  
131 across the genome while the majority of significant changes are localized to regions in close  
132 proximity to the transcriptional start site (TSS) (**Fig 2B, C**). Similar changes were observed  
133 for neuronal H3K9ac and H3K27ac, although less regions were affected when compared to  
134 H3K4me3 (**Fig. S3**). We also observed significantly altered H3K4me1 in neurons of *Setd1b*  
135 cKO mice (**Fig 2B**). These changes were also almost exclusively detected in vicinity to the  
136 TSS (**Fig 2B**) but in contrast to the other investigated histone-modifications, many of the  
137 significantly altered genomic regions exhibited increased H3K4me1 levels in *Setd1b* cKO  
138 mice (**Fig. 2B, C**). To further analyze these data, we first asked if the observed changes in  
139 histone-modifications occur within the same genomic regions. As expected the number of  
140 genes showing reduced H3K4me3 exceeded by far the number of genes showing reduced  
141 levels of H3K9ac, H3K27ac or altered H3K4me1 (Fig S3). Nevertheless, almost all regions  
142 exhibiting decreased H3K9ac where also marked by decreased H3K4me3, while the regions  
143 showing decreased H3K27ac were mainly localized to different genes (**Fig. S3**). These data  
144 support previous findings, showing that H3K4me3 is functionally linked to H3K9ac  
145 (Kerimoglu *et al.*, 2013; Kerimoglu *et al.*, 2017b)and suggest that the observed changes in  
146 H3K27ac are mainly due to secondary effects. Interestingly, decreased H3K4me3 in *Setd1b*  
147 cKO manifested exclusively downstream of the TSS, indicating that loss of *Sedt1b* may affect  
148 peak width (**Fig 2D**). We decided to further explore this observation and noticed that there  
149 was an obvious difference amongst the genes that exhibit decreased H3K4me3 and increased  
150 H3K4me1 (**Fig. 2E**) when compared to genes that show exclusively decreased H3K4  
151 methylation around the TSS (**Fig 2F**). Namely, the change in H3K4me3 was most significant

152 in genes with decreased H3K4me3 and increased H3K4me1 and was characterized by a  
153 substantially reduced H3K4me3 peak width (**Fig 2E**), when compared to genes with  
154 decreased H3K4me3 and H3K4me1 (**Fig 2F**). Findings from other cell types suggest a  
155 gradient of H3K4 methylation states in which the proximity of the mark to the TSS is  
156 correlated to the level of gene-expression. Thus, genes with broader H3K4me3 peaks at the  
157 TSS exhibit the highest and most consistent expression levels and represent genes of  
158 particular importance for cellular identity (Benayoun *et al*, 2015; Soares *et al.*, 2017). Indeed,  
159 our data revealed that the genes which are characterized by decreased H3K4me3 and  
160 increased H3K4me1 in *Setd1b* cKO mice, already exhibit significantly broader H3K4me3  
161 peaks under basal conditions, when compared to genes characterized by decreased H3K4me3  
162 but either decreased or unchanged H3K4me1 levels (**Fig 2 G**). Interestingly, these genes were  
163 also expressed at significantly higher levels under baseline conditions (**Fig 2 H**). Taken  
164 together, our findings suggest that *Setd1b* may be of particular importance for the expression  
165 of genes linked to the specific function of hippocampal neurons. In line with this, functional  
166 pathway analysis revealed that the genes with decreased H3K4me3 and increased H3K4me1  
167 and thus having the broadest H3K4me3 peak under basal conditions, represent pathways  
168 intimately linked to the function of excitatory hippocampal neurons (**Fig 2I**). Most  
169 importantly, this was not the case for the genes of the other two categories (**Fig 2I**). In  
170 summary, our data show that loss of *Setd1b* from hippocampal neurons leads to distinct  
171 changes in neuronal histone-methylation and point to a specific role of *Setd1b* in the  
172 expression of genes essential for neuronal identity and cognitive function.

173

#### 174 *Setd1b* controls the levels of highly expressed neuronal genes characterized by a broad 175 H3K4me3 peak at the TSS

176 To test the impact of *Setd1b* on gene-expression directly, we analyzed the RNA-sequencing  
177 data obtained from neuronal nuclei of the same hippocampi used to generate ChIP-seq data  
178 (See Fig 2A, Fig S2). In line with the established role of H3K4me3 in active gene-expression,  
179 we mainly detected down-regulated genes when comparing control to *Setd1b* cKO mice (**Fig**  
180 **3A**). In fact, the comparatively few up-regulated genes were all lowly expressed at baseline  
181 conditions suggesting rather unspecific effects (RPKM down-regulated genes = 18.77 +/- 1.45  
182 vs. up-regulated genes RPKM = 3.08 +/- 0.26;  $P < 0.0001$ ). Further analysis revealed that the  
183 TSS of genes down-regulated in *Setd1b* cKO mice is characterized by significantly reduced  
184 H3K4me3 peak-width and increased H3K4me1 (**Fig 3B, C**). This observation was specific to  
185 the genes down-regulated in *Setd1b* cKO mice, since random sets of genes that were not de-  
186 regulated in *Setd1b* cKO mice show normal H3K4me3 and H3K4me1 levels at the TSS (**Fig**  
187 **3D**). We also observed that the genes down-regulated as a result of *Setd1b* deletion were  
188 characterized by a significantly broader H3K4me3 peak and higher expression under basal

189 conditions (**Fig 3C, E**). A functional pathway analysis revealed that the genes down-regulated  
190 in *Setd1b* cKO mice are intimately linked to synaptic plasticity and learning and memory  
191 related processes (**Fig 3F**). Taken together, these data further suggest that *Setd1b* controls a  
192 specific set of genes that are characterized by a broad H3K4me3 peak at the TSS, are highly  
193 expressed in hippocampal neurons under basal conditions and play a specific role in neuronal  
194 plasticity and identity.

195

196 ***The regulation of highly expressed neuronal identity genes with broad H3K4me3 peaks is a***  
197 ***specific feature of Setd1b.***

198 To provide further evidence for the specific role of *Setd1b* in the regulation of neuronal  
199 plasticity and neuronal identity genes we decided to compare *Setd1b* to other mammalian  
200 H3K4 *KMTs*. We have previously generated comparable H3K4me3 and H3K4me1 ChIP-seq  
201 data from neuronal nuclei obtained from the hippocampal CA region of mutant mice that lack  
202 either *Kmt2a* or *Kmt2b* from excitatory forebrain neurons (Kerimoglu *et al.*, 2017b). To  
203 ensure reliable comparison we reanalyzed in parallel the H3K4me3 and H3K4me1 Chip-seq  
204 datasets obtained from hippocampal neuronal nuclei of *Kmt2a*, *Kmt2b* and *Set1b* cKO mice.  
205 In line with the previous findings, all 3 *Kmt* mutant mice exhibit a substantial amount of TSS  
206 regions with decreased H3K4me3 (**Fig 4A**). Interestingly, we also detected TSS regions with  
207 decreased H3K4me1 in all mutant mice, but only in *Setd1b* cKO mice a substantial number of  
208 TSS regions exhibited increased H3K4me1 (**Fig 4B**). In addition, there was little overlap  
209 amongst the TSS regions with decreased H3K4me3 in *Kmt2a*, *Kmt2b* and *Setd1b* mutant  
210 mice, providing further evidence that *Setd1b* controls a unique gene-expression program in  
211 neuronal cells (**Fig 4C**). To test this hypothesis directly, we decided to compare the  
212 corresponding gene-expression changes in the hippocampal CA1 region of the 3 *KMT* mutant  
213 mice. While the ChIP-seq data available for *Kmt2a* and *Kmt2b* mutant mice had been  
214 generated from neuronal nuclei, the corresponding gene-expression analysis represents RNA-  
215 seq data obtained from bulk tissue of the hippocampal CA1 region (Kerimoglu *et al.*, 2017b).  
216 To allow optimal comparison of these RNA-seq data to the gene-expression changes in  
217 *Setd1b* mutant mice, we also performed bulk RNA-seq from the hippocampal CA1 region of  
218 *Setd1b* cKO mice and control littermates. We observed 485 genes that were significantly  
219 down-regulated when comparing control to *Setd1b* cKO mice (**Fig 4D**). These genes largely  
220 overlapped with the down-regulated genes detected via neuronal specific RNA-seq in *Setd1b*  
221 cKO mice (**Fig S4**). While the total number of genes differentially expressed in the  
222 hippocampal CA1 region of *Kmt2a*, *Kmt2b* and *Setd1b* cKO mice was comparable, there was  
223 little overlap amongst them (**Fig 4E**). Recently, RNA-sequencing data was reported for mice  
224 that were heterozygous for *Setd1a*. Although these mutants were heterozygous constitutive  
225 knock out mice and furthermore cortical tissue was analyzed instead of the hippocampus

226 (Mukai *et al.*, 2019), it is interesting to note that there was virtually no overlap regarding the  
227 genes down-regulated in *Setd1a* knock out mice, when compared to the data obtained from  
228 our *Setd1b* cKO mice (**Fig. S5**). Further support for a specific role of *Setd1b* in neuronal  
229 genes expression was revealed by the finding that the genes down-regulated in *Setd1b* cKO  
230 mice exhibited a significant enrichment for neuronal identity genes, while this was not the  
231 case for genes down-regulated in *Kmt2a* or *Kmt2b* cKO mice (**Fig 4F**). In line with these data  
232 we observed that genes down-regulated in *Kmt2a* or *Kmt2B* cKO mice display decreased  
233 H3K4me3 at the TSS, while the levels of H3K4me1 were unaffected (**Fig 4G**). In striking  
234 contrast, only the genes down-regulated in *Setd1b* cKO mice were characterized by reduced  
235 H3K4me3 and also increased H3K4me1 (**Fig 4G**). Consequently, the genes that exhibit  
236 decreased H3K4me3 levels and were down-regulated in *Setd1b* cKO mice displayed  
237 significantly broader H3K4me3 peak at the TSS (**Fig 4H**) and were expressed a higher levels  
238 under basal conditions when compared the genes controlled by KMT2A or KMT2B (**Fig 4I**).  
239 Functional pathway analysis showed that genes affected in the 3 KMT mutant mice represent  
240 different functional pathways. Interestingly, when compared to the gene-expression data  
241 obtained from *Kmt2a* or *Kmt2b* cKO mice, genes down-regulated in *Setd1b* cKO mice  
242 represent pathways intimately linked to learning and memory and the function of  
243 hippocampal neurons (**Fig 4J**). Further analysis revealed that the genes affected in *Kmt2a*  
244 cKO mice are enriched for more general cellular processes, for processes related to gene-  
245 expression control and also neuronal plasticity related functions (**Fig S6A**) while the genes  
246 decreased in *Kmt2b* cKO mice represent almost exclusively pathways important for basal  
247 cellular function but not specifically important for neurons (**Fig S6B**). In sum, these data  
248 support the view that *Setd1b* is of particular importance for the expression of genes essential  
249 for the identity of hippocampal neurons and synaptic plasticity. This view is further supported  
250 by the direct comparison of hippocampus-dependent memory function in *Setd1b*, *Kmt2a* and  
251 *Kmt2b* cKO mice. While loss of any of the 3 KMT's leads to impaired spatial reference  
252 memory in the Morris water maze task (Kerimoglu *et al.*, 2013; Kerimoglu *et al.*, 2017b) (see  
253 Fig 1), memory impairment is more pronounced in *Setd1b* cKO (**Fig S7**).

254

255 **Single cell expression pattern likely contributes to the distinct role of *Setd1b* on neuronal**  
256 **gene-expression.**

257 In our effort to further elucidate the specific role of *Setd1b* on neuronal gene-expression and  
258 memory function we noticed that the levels of the H3K4 methyltransferases differ  
259 substantially in hippocampal neurons of the adult mouse brain. Surprisingly, our RNA-seq  
260 data from neuronal nuclei revealed *Setd1b* as the least expressed H3K4 methyltransferases  
261 when compared to *Kmt2a* or *Kmt2b* (**Fig 5A**). These data might indicate that *Setd1b* is  
262 generally expressed at very low levels or that alternatively only few cells may express *Setd1b*,

263 a question that cannot be addressed on the basis our neuron-specific bulk RNA-seq. Thus, we  
264 decided to perform single nuclei sequencing. We isolated the hippocampus from 3-month old  
265 wild type mice and sorted NeuN + nuclei using our established protocol (**Fig 5B**). These  
266 nuclei were then subjected to sequencing. As expected, we detected excitatory neurons of the  
267 cornu ammonis (CA) and dentate gyrus region as well as inhibitory neurons (**Fig 5C**). Since  
268 our analysis so far was focused on the hippocampal CA region of mice that lack *Setd1b* from  
269 excitatory neurons, we selected the CA excitatory neurons and plotted the expression of  
270 *Kmt2a*, *Kmt2b* and *Setd1b*. In line with the data obtained from bulk sequencing of  
271 hippocampal neuronal nuclei, we observed that *Kmt2a* expression was most prominent when  
272 compared to *Kmt2b* or *Setd1b* (**Fig 5D**). However, this difference was not due to the absolute  
273 expression value per cell, which was comparable for all 3 KMT's (**Fig 5E**). Rather, we  
274 observed that *Kmt2a* was expressed in the majority of the analyzed CA excitatory neurons,  
275 while *Kmt2b* and *Setd1b* were expressed in a comparatively small subset of cells (**Fig 5F**).  
276 Next, we compared the gene-expression in neurons that either express *Kmt2a*, *Kmt2b* or  
277 *Setd1b* to cells that do not express the corresponding gene (**Fig 5E**). A comparison of *Kmt2a*  
278 (+) vs *Kmt2a* (-) cells revealed that 897 genes were significantly increased in *Kmt2a* (+) cells,  
279 while 432 genes were expressed at higher levels in *Kmt2b* (+) and 214 genes in *Setd1b* (+)  
280 cells (**Fig 5G**). Although the presence of *Kmt2a* affected more genes when compared to  
281 *Kmt2b* and *Setd1b*, the impact on gene-expression was comparatively small, which is  
282 indicated by the corresponding fold change of significantly differentially expressed genes. In  
283 fact, although the presence of *Setd1b* affected the least genes, the observed fold change of  
284 these genes was significantly greater when compared to *Kmt2* and *Kmt2b* (**Fig 5G**). Only 7%  
285 of the genes significantly increased in *Kmt2a* (+) vs *Kmt2a* (-) cells showed a fold change  
286 greater than 1.5 (**Fig 5G**). In case of *Kmt2b* (+) cells 41% of the regulated genes showed a  
287 fold change greater than 1.5 and for *Setd1b* this was true for 66 % of the regulated genes (**Fig**  
288 **5G**). These data suggest that the presence of *Kmt2a* contributes to the expression of many  
289 genes while its impact seems to be limited, when compared for example to the impact that the  
290 presence of *Setd1b* has on gene-expression. Hence, *Setd1b* affects comparatively less genes  
291 but with greater impact. When we subjected the genes specifically enriched in *Kmt2a* (+),  
292 *Kmt2b* (+) or *Setd1b* (+) cells to gene ontology and pathways analysis we observed that genes  
293 increased in the presence of *Setd1b* at the single cell level represent pathways linked to  
294 hippocampal function and interestingly also histone-acetylation (**Fig 5H**), while these  
295 pathways were much less affected in *Kmt2a* (+) and *Kmt2b* (+) cells (**Fig. 5H**). This is line  
296 with the finding that also at the single cell level, there is little overlap between the genes  
297 specifically enriched in either *Kmt2a* (+), *Kmt2b* (+) or *Setd1b* (+) cells (**Fig 5G.**). We also  
298 calculated the eigen-value of the genes increased in *Setd1b* (+) cells and analyzed its  
299 expression *Setd1b* (+) and (-) cells as well as in cells positive for *Kmt2a* or *Kmt2b* (**Fig 5I**). In



300 line with our data, the eigen-value of *Setd1b*-specific genes was significantly increased in  
301 *Set1b* (+) cells compared to *Setd1b* (-) cells but also in cells positive for *Kmt2a* or *Kmt2b*  
302 (**Fig5I**). In summary, these data further support a specific role of *Setd1b* in neuronal function  
303 and suggest that hippocampal neurons expressing *Setd1b* in addition to other H3K4 KMTs  
304 may have a “plasticity benefit”.

305

306

## 307 **DISCUSSION**

308 We show that loss of *Setd1b* from excitatory forebrain neurons impairs learning and memory  
309 in mice. These data are in line with previous findings showing that hippocampal H3K4me3  
310 increases in response to memory training in rodents (Gupta *et al.*, 2010), while its levels are  
311 reduced in the hippocampus of a mouse for AD-like neurodegeneration (Gjoneska *et al.*,  
312 2015b) and in postmortem human brain samples of patients suffering from cognitive diseases  
313 (Shulha *et al.*, 2012). Our data furthermore support previous genetic studies linking mutations  
314 in *Setd1b* to intellectual disability (Hiraide *et al.*, 2018) (Labonne *et al.*, 2016). Since in our  
315 work *Setd1b* is not deleted during brain development but only in the postnatal brain, the  
316 presented findings suggest that reduced *Setd1b* expression can lead to cognitive dysfunction  
317 independent of developmental alterations. Impaired hippocampus-dependent memory has  
318 been also observed in mice that lack *Kmt2a* (Gupta *et al.*, 2010; Kerimoglu *et al.*, 2017b) or  
319 *Kmt2b* (Kerimoglu *et al.*, 2013) from excitatory neurons of the adult forebrain. Interestingly,  
320 mice heterozygous for *Setd1a*, the close homologue to *Setd1b* that is genetically linked to  
321 schizophrenia, show no impairment in the water maze task but rather exhibit impaired  
322 working memory and schizophrenia-like phenotypes (Mukai *et al.*, 2019). These data suggest  
323 that the different H3K4 KMT's, at least *Kmt2a*, *Kmt2b*, *Setd1a* and *Setd1b*, serve distinct  
324 functions in the adult brain. The molecular characterization of *Setd1b* cKO further confirms  
325 this view. In line with the role of *Setd1b* in regulating H3K4me4, we observed a substantial  
326 decrease of neuronal H3K4me3 and the vast majority of these changes were observed at the  
327 TSS region of genes. Our data furthermore revealed that many genes with decreased  
328 H3K4me3 also exhibited reduced H3K9ac, which is in line with previous data showing that  
329 H3K4me3 appears to be a pre-requisite for H3K9ac, most likely since H3K4 KMT's interact  
330 with histone-acetyltransferases (Kerimoglu *et al.*, 2013; Wang *et al.*, 2009). For example, both  
331 *Setd1b* and the histone-acetyltransferase *Kat2a* where shown to interact with WDR5 (Lin *et al.*,  
332 2016; Ma *et al.*, 2018), which is interesting since loss of *Kat2a* from excitatory forebrain  
333 neurons also leads to severely impairment of spatial reference memory (Stilling *et al.*, 2014).  
334 Somewhat unexpected was the observation that H3K4me1 levels were increased at a  
335 substantial number of TSS regions that exhibited decreased H3K4me3. A similar observation  
336 has however been made in yeast that expresses only one H3K4 KMTs, namely *Set1* (Soares *et*

337 *al.*, 2017). The authors show that highly expressed genes have the broadest H3K4me3 peak at  
338 the TSS, while moderate to low expressed genes are characterized by a narrow H3K4me3  
339 peak and comparatively higher H3K4me1 levels. This H3K4me-dependent pattern of gene-  
340 expression was directly correlated to degree of SET1 activity at the TSS. In agreement with  
341 these data we observed that the genes with decreased H3K4me3 and increased H3K4me1 in  
342 *Setd1b* cKO mice are indeed characterized by a broad H3K4me3 peak at the TSS and high  
343 expression levels at the basal state. It is in this context interesting to note that *Setd1b* is the  
344 closest mammalian orthologue of the yeast SET1 protein, from which the other H3K4  
345 methyltransferases have evolved (Shilatifard, 2012). Importantly, when we analyzed gene-  
346 expression in *Setd1b* cKO mice we observed that not all genes that exhibit reduced H3K4me3  
347 display reduced mRNA expression. Rather, we found that specifically genes with decreased  
348 H3K4me3 and increased H3K4me1, hence only the genes with the broadest H3K4me3  
349 distribution at the TSS were significantly down-regulated in *Setd1b* cKO mice. These genes  
350 represent key pathways linked to memory formation and the identity of hippocampal neurons,  
351 which is also in line with a recent study reporting that memory training specifically activates  
352 hippocampal genes with broad H3K4me3 peaks at the TSS (Collins *et al.*, 2019). In sum, these  
353 data suggest that *Setd1b* is important for the expression of neuronal identity genes in the  
354 hippocampus, that are linked to learning and memory processes, a function that might be  
355 specifically associated with *Setd1b*. Thus, when we directly compared genes down-regulated  
356 in *Setd1b*, *Kmt2a* or *Kmt2b* cKO mice, the genes down-regulated in *Setd1b* cKO mice were  
357 characterized by significantly broader H3K4me3 peaks at the TSS, significantly higher  
358 baseline expression and they were enriched for neuronal identity genes and pathways  
359 specifically important for learning-related processes. A significant gradient *Setd1b* > *Kmt2a* >  
360 *Kmt2b* was observed for all of these comparisons. In line with these data, also the memory  
361 performance in the water maze training was more severely affected in *Setd1b* cKO mice  
362 followed by mice lacking *Kmt2a* or *Kmt2b*. These data may suggest that H3K4 KTM's other  
363 than *Setd1b* are essential to ensure the sufficient expression of genes important for basal  
364 cellular processes in neurons, while *Setd1* enables to preeminent expression of neuronal  
365 identity genes. This view is in line with a recent study in mouse embryonic stem cells in  
366 which *Setd1b* was associated with the expression of highly expressed genes that exhibit a  
367 broad H3K4me3 peak, while *Kmt2b* was linked to the expression of genes with narrow  
368 H3K4me3 peaks (Sze *et al.*, 2020). Interestingly, this study suggested a functional redundancy  
369 of *Setd1b* and *Setd1a*. It is likely that this is true for gene-expression programs related to more  
370 general cellular processes. However, the situation might be different for genes specifically  
371 important in post-mitotic neurons. Moreover, mutations in either *Setd1a* or *Setd1b* lead to  
372 distinct neuropsychiatric diseases and unlike *Setd1b* cKO mice, *Setd1a* heterozygous mutant  
373 mice do not exhibit impairment of long-term memory consolidation (Mukai *et al.*, 2019). At

374 present we cannot conclusively answer the question how *Setd1b* affects the expression of  
375 specifically neuronal identity genes. Previous data suggest that H3K4 KMT's associate with  
376 different co-activators (Lee *et al*, 2006), (Dreijerink *et al*, 2006; Shilatifard, 2012)  
377 (Hughes *et al*, 2004; Yokoyama *et al*, 2004) (Scacheri *et al*, 2006) which could  
378 explain the regulation of specific gene-expression programs. Our data provides a  
379 complimentary explanation that should be considered in addition. Using single-  
380 nucleus-sequencing we observed that *Setd1b* is expressed in a comparatively small  
381 number of hippocampal neurons, when compared for example to *Kmt2a*. Yet, the  
382 impact on memory function is most significant when hippocampal neurons lack  
383 *Setd1b*, as for example compared to the more abundantly expressed *Kmt2a* or *Kmt2b*.  
384 The comparison of *Setd1b* expressing hippocampal neurons to cells that do not  
385 express *Setd1b* confirmed a specific role for *Setd1b* in the expression of genes  
386 intimately linked to neuronal function and memory processes. This was different for  
387 *Kmt2a* and *Kmt2b* expressing neurons suggesting that the presence of *Setd1b* at the  
388 single cell level enables particularly efficient expression of genes important for the  
389 function of hippocampal neurons and memory consolidation. It has to be re-iterated  
390 that these genes are also detectable in neurons that lack *Setd1b* and express *Kmt2a* or  
391 *Kmt2b*, but to a lesser extent (See Fig 5I). This allows for some interesting  
392 hypotheses. For example, a number of studies demonstrated that upon learning a  
393 specific set of neurons – in most cases neurons that initiate a *cFos*-dependent gene-  
394 expression program – become part of a neuronal circuitry important for memory  
395 encoding. Particularly important are those neurons that are later reactivated during  
396 memory retrieval (Reijmers *et al*, 2007; Tonegawa *et al*, 2018) (Josselyn SA, 2019).  
397 All of these studies found that only a small fraction of the originally activated cells  
398 became reactivated during memory retrieval. It is thus tempting to speculate that the  
399 activity of genes such as *Setd1b* might help to shape the neuronal ensemble that will  
400 indeed be reactivated during memory retrieval, a hypothesis that would need to be  
401 tested in further studies. Taking into account that decreased neuronal H3K4me3 levels  
402 have been observed in cognitive and neurodegenerative diseases therapeutic strategies  
403 that reinstate specifically the expression of neuronal plasticity genes controlled by  
404 *Setd1b* might be particularly helpful. We suggest that the various epigenetic drugs  
405 currently tested in pre-clinical and clinical settings for cognitive diseases should  
406 especially be analyzed for their potential to reinstate the H3K4me3 peak width at  
407 neuronal identity genes.

408 In conclusion, we show that *Setd1b* is essential for memory consolidation and ensures the  
409 proper expression of neuronal identity genes. Since *Setd1b* is expressed only in a subset of  
410 hippocampal neurons it may provide a plasticity benefit to those cells thereby regulating  
411 memory formation at the molecular level. In turn, *Setd1b*-related gene-expression programs  
412 could be a suitable therapeutic target to treat cognitive diseases and help patients suffering  
413 from intellectual disability.

414

## 415 **MATERIALS AND METHODS**

416

### 417 **Animals**

418 All animals used in this study were C57BL/6J mice and of 3-6 months of age. The  
419 experimental groups were age and sex matched. Mice were kept in standard home cages with  
420 food and water provided *ad libitum*. All experiments were performed according to the animal  
421 protection law of the state of Lower Saxony.

422

### 423 **Behavior experiments**

424 The behavioral experiments were performed as described previously (Kerimoglu *et*  
425 *al.*, 2017b). For in depth feature analysis from water maze data, a modified  
426 version of MUST-C algorithm was used (Illouz *et al.*, 2016).

427

### 428 **Tissue isolation and processing**

429 Hippocampal CA tissues were dissected from WT and *Setd1b* cKO mice, flash frozen in  
430 liquid nitrogen and stored at -80°C until further processing.

431

### 432 **Cell-type specific nuclear RNA isolation and sequencing**

433 Frozen CA tissues from left and right hemisphere of two mice were pooled together and  
434 processed on ice to maintain high RNA integrity. Tissue was homogenized using a plastic  
435 pestle in a 1.5mL Eppendorf tube containing 500 uL EZ prep lysis buffer (Sigma, NUC101-  
436 1KT) with 30 strokes. The homogenate was transferred into 2 mL microfuge tubes, lysis  
437 buffer was added up to 2 mL and incubated on ice for 7 minutes. After centrifuging for 5  
438 minutes at 500g supernatant was removed and the nuclear pellet was resuspended into 2 mL  
439 lysis buffer and incubated again on ice (7 minutes). After centrifuging for 5 minutes at 500g,  
440 the supernatant was removed and the nuclei pellet was resuspended into 500ul nuclei storage  
441 buffer (NSB: 1x PBS; Invitrogen, 0.5% RNase free BSA; Serva, 1:200 RNaseIN plus  
442 inhibitor; Promega, 1x EDTA-free protease inhibitor; Roche) and filtered through 40 µm  
443 filter (BD falcon) with additional 100 µL NSB to collect residual nuclei from the filter.

444 Nuclei were stained with anti-NeuN-Alexa488 conjugated antibody (1:1000) for 45 minutes  
445 and washed once with NSB. Stained nuclei were then FACS-sorted with FACSaria III using  
446 85  $\mu$ m nozzle. Nuclei were gated by their size, excluding doublets and neuronal nuclei were  
447 separated from non-neuronal nuclei by their NeuN-Alexa488 fluorescence signal. Sorted  
448 nuclei were collected into a 15 mL falcon tube precoated with NSB, spun down and RNA was  
449 isolated using Trizol LS. After addition of chloroform according to the Trizol LS protocol,  
450 aqueous phase was collected and RNA was isolated by using Zymo RNA clean &  
451 concentrator-5 kit with DNase treatment. Resulting RNA concentration were measured in  
452 Qubit and RNA-seq was performed using 100ng of neuronal RNA with illumina TruSeq  
453 RNA Library Prep Kit. Since glial nuclei are smaller and contains very little amount of RNA,  
454 neuronal nuclear RNA was scaled down and 1ng from both neuronal and glial nuclear RNA  
455 was used to make RNA-seq libraries using Takara SMART-Seq v4 Ultra Low Input RNA  
456 Kit. Libraries were sequenced using single-end 75 bp in Nextseq 550 or single-end 50 bp in  
457 HiSeq 2000, respectively.

458

459

#### 460 **Cell-type specific chromatin isolation and ChIP sequencing**

461 Frozen tissues were homogenized, formaldehyde (1%) fixed for 10 minutes and quenched  
462 with 125mM glycine for 5 minutes. Debris was removed by sucrose gradient centrifugation.  
463 The resulting nuclear pellet was stained with anti-NeuN-Alexa488 conjugated antibody  
464 (1:1000) for 25 minutes and washed 3 times with PBS. Stained nuclei were then FACS sorted  
465 with FACSaria III using 85  $\mu$ m nozzle. Nuclei were gated similarly as described  
466 previously(Halder *et al.*, 2016). Sorted nuclei were collected into a 15mL falcon tube and  
467 transferred into 1.5mL tubes. The nuclear pellet was flash frozen in liquid nitrogen and saved  
468 at -80°C for further processing. For chromatin shearing, the pellet was resuspended into  
469 100uL RIPA buffer (containing 1% SDS) and sonicated for 25 cycles in Diagenode bioruptor  
470 plus with high power and 30 cycles on/ 30 cycles off. Chromatin shearing was checked by  
471 taking a small aliquot and decrosslinking the DNA by 30 minutes RNase and 2 hours of  
472 proteinase K treatment. DNA was isolated using SureClean Plus protocol. Sheared chromatin  
473 size was determined using Bioanalyzer 2100(DNA high sensitivity kit) and the concentration  
474 was measured using Qubit 2.0 fluorometer (DNA high sensitivity kit). 0.3 $\mu$ g chromatin was  
475 used along with 1  $\mu$ g of antibody to do ChIP for H3K4me3 (Abcam ab8580), H3K4me1  
476 (Abcam ab8895), H3K27ac (Abcam ab4729) and H3K9ac (Millipore 07-352). ChIP was  
477 performed as previously described(Halder *et al.*, 2016). The resulting ChIP DNA was  
478 subjected to library preparation using NEBNext Ultra II DNA library preparation kit and  
479 sequenced for single end 50bp at illumina HiSeq 2000.

480

## 481 **ChIP-Seq Analysis**

482 Base calling and fastq conversion were performed using Illumina pipeline. Quality control  
483 was performed using fastqc ([www.bioinformatics.babraham.ac.uk/projects/fastqc](http://www.bioinformatics.babraham.ac.uk/projects/fastqc)). Reads  
484 were mapped to mm10 mouse reference genome with STAR aligner v2.3.0.w. PCR duplicates  
485 were removed by *rmdup -s* function of samtools. BAM files with unique reads belonging to  
486 the same group were merged into a single BAM file with the *merge* function of samtools.  
487 Profile plots were created from these merged BAM files with NGSPlot. Peak calling was  
488 performed using MACS2 against the input corresponding to the particular group (i.e., control  
489 or cKO) using  $q < 0.1$ . Consensus peaksets were generated for each histone modification  
490 individually using the Diffbind package of Bioconductor with the command *dba.count* and  
491 the parameter *minOverlap=1*. Then, these consensus peaksets were intersected with each  
492 other using the *intersect* function of bedtools with default parameters.. The differential  
493 binding analysis for each histone mark between control and *Setd1b* cKO was then performed  
494 using Diffbind with this common peakset as input. For the comparison of H3K4me3 and  
495 H3K4me1 changes in *Kmt2a* cKO, *Kmt2b* cKO and *Setd1b* cKO common peaksets for each  
496 individual histone mark from three separate ChIP-Seq experiments were extracted. In this  
497 case, first, consensus peaksets for a histone mark from each individual ChIP-Seq experiment  
498 (i.e., “Control vs *Kmt2a* cKO”, “Control vs *Kmt2b* cKO” and “Control vs *Setd1b* cKO”) were  
499 determined using Diffbind. For the purpose of comparing the effects of the three KMT  
500 knockdowns on H3K4me3 or H3K4me1 the differential binding analyses for each individual  
501 ChIP-Seq experiment were performed always utilizing these common consensus peaksets.  
502 Diffbind package was used for differential binding analysis with in-built DESEQ2 option for  
503 differential analysis. The annotation of the genomic regions was performed with HOMER.

504

## 505 **RNA-Seq Analysis**

506 Base calling, fastq conversion, quality control, mapping of reads to mouse reference genome  
507 (mm10) were performed as described before (Kerimoglu *et al.*, 2017b)Seq. Reads were  
508 counted using FeaturesCount (<http://bioinf.wehi.edu.au/featureCounts/>). Differential  
509 expression was analyzed with DESeq2 package of Bioconductor RPKM values were  
510 calculated using edgeR package of Bioconductor.

511

## 512 **Single-nucleus RNA-Seq**

513 Unfixed NeuN+ neuronal nuclei were isolated as mentioned above (section: Cell-type specific  
514 nuclear RNA isolation and sequencing). Sorted neuronal nuclei were counted in a Neubauer  
515 chamber with 10% trypan blue (in PBS) and nuclei concentration were adjusted to 1000  
516 nuclei/ $\mu$ L. The nuclei were further diluted to capture and barcode 4000 nuclei according to  
517 Chromium single cell 3' reagent kit v3 (10X genomics). Single nuclei barcoding, GEM

518 formation, reverse transcription, cDNA synthesis and library preparation were performed  
519 according to 10X genomics guidelines. Finally, the library was sequenced in Illumina  
520 NextSeq 550 according to manufacturer's protocol. Gene counts were obtained by aligning  
521 reads to the mm10 genome (GRCm38.p4)(NCBI:GCA\_000001635.6) using CellRanger  
522 software (v.3.0.2) (10XGenomics). The CellRanger count pipeline was used to generate a  
523 gene-count matrix by mapping reads to the pre-mRNA as reference to account for unspliced  
524 nuclear transcripts. The dataset contained 3841 cells with a mean of 31.053 total read counts  
525 over protein-coding genes.

526 The SCANPY package was used for pre-filtering, normalization and clustering (Wolf *et*  
527 *al*, 2018) Initially, cells that reflected low-quality cells (either too many or too few reads,  
528 cells isolated almost exclusively, cells expressing less than 10% of house-keeping genes  
529 (Eisenberg & Levanon, 2013) were excluded remaining in 3801 cells. Next, counts  
530 were scaled by the total library size multiplied by 10.000, and transformed to log space. A  
531 total of 3066 highly variable genes were identified based on dispersion and mean, the  
532 technical influence of the total number of counts was regressed out, and the values were  
533 rescaled. Principal component analysis (PCA) was performed on the variable genes, and  
534 UMAP was run on the top 50 principal components (PCs) (Becht *et al*, 2018), The top  
535 50 PCs were used to build a k-nearest-neighbours cell-cell graph with k= 200 neighbours.  
536 Subsequently, spectral decomposition over the graph was performed with 50 components, and  
537 the Louvain graph-clustering algorithm was applied to identify cell clusters. We confirmed  
538 that the number of PCs captures almost all the variance of the data. For each cluster, we  
539 assigned a cell-type label using manual evaluation of gene expression for sets of known  
540 marker genes. Two cell-type clusters identified as neurons from dentate gyrus and inhibitory  
541 neurons were excluded. Remaining excitatory neuronal cells from CA region were re-  
542 clustered using the same settings as described above. For each cluster, differentially expressed  
543 genes were detected using the Wilcoxon rank-sum test as implemented in the function  
544 `rank_genes_groups` in SCANPY.

545

#### 546 **Data availability**

547 All RNA and ChIP-seq datasets will be made available via GEO database

548

#### 549 **References**

550 Becht E, McInnes L, Healy J, Dutertre CA, Kwok I, Ng LG, Ginhoux F, Newell EW  
551 (2018) Dimensionality reduction for visualizing single-cell data using UMAP. .  
552 *Nature biotechnology*, 10.1038/nbt.4314. Advance online publication.

553 Benayoun BA, Pollina EA, Ucar D, Mahmoudi S, Karra K, Wong ED, Devarajan K,  
554 Daugherty AC, Kundaje AB, Mancini E *et al* (2015) H3K4me3 Breadth Is Linked  
555 to Cell Identity and Transcriptional Consistency. *Cell* 165: 1281–1286  
556 Brici D, Zhang Q, Reinhardt S, Dahl A, Hartmann H, Schmidt K, Goveas N, Huang J,  
557 Gahurova L, Kelsey G *et al* (2017) The histone 3 lysine 4 methyltransferase  
558 Setd1b is a maternal effect gene required for the oogenic gene expression  
559 program. *Development* 144  
560 Choudhury R, Singh S, Arumugam S, Roguev A, Stewart AF (2019) The Set1  
561 complex is dimeric and acts with Jhd2 demethylation to convey symmetrical  
562 H3K4 trimethylation. *Genes & development* 33: 550-564  
563 Collins BE, Sweatt JD, Greer CB (2019) Broad domains of histone 3 lysine 4  
564 trimethylation are associated with transcriptional activation in CA1 neurons of  
565 the hippocampus during memory formation. *Neurobiol Learn Mem* 5: 149-157  
566 Dreijerink KM, Mulder KW, Winkler GS, Hoppener JW, Lips CJ, Timmers HT  
567 (2006) Menin links estrogen receptor activation to histone H3K4 trimethylation.  
568 *Cancer Research* 66: 4929-4935  
569 Eisenberg E, Levanon EY (2013) Human housekeeping genes, revisited. *Trends*  
570 *in genetics* 29: 569–574  
571 Fischer A (2014) Epigenetic memory: the Lamarckian brain. *EMBO J* 33: 945-967  
572 GJoneska E, Pfenning A, Mathys H, Quon G, Kundaje A, Tsai L, Kellis M (2015a)  
573 Conserved epigenomic signals in mice and humans reveal immune basis of  
574 Alzheimer's disease. *Nature* 518: 365-369  
575 GJoneska E, Pfenning AR, Mathys H, Quon G, Kundaje A, Tsai LH, Kellis M (2015b)  
576 Conserved epigenomic signals in mice and humans reveal immune basis of  
577 Alzheimer's disease. *Nature* 518: 365-369  
578 Guenther MG, Jenner RG, Chevalier B, Nakamura T, Croce CM, Canaani E, Young  
579 RA (2006) Global and Hox-specific roles for the MLL1 methyltransferase. *Proc*  
580 *Natl Acad Sci U S A* 102: 8603-8608  
581 Gupta S, Kim SY, Artis S, Molfese DL, Schumacher A, Sweatt JD, Paylor RE, Lubin  
582 FD (2010) Histone methylation regulates memory formation. *J Neurosci* 30:  
583 3589-3599  
584 Halder R, Hennion M, Vidal RO, Shomroni O, Rahman RU, Rajput A, Centeno TP,  
585 van Bebber F, Capece V, Vizcaino JC *et al* (2016) DNA methylation changes in  
586 plasticity genes accompany the formation and maintenance of memory. *Nat*  
587 *Neurosci* 19: 102-110  
588 Hiraide T, Nakashima M, Yamoto K, Fukuda T, Kato M, Ikeda H, Sugie Y, Aoto K,  
589 Kaname T, Nakabayashi K *et al* (2018) De novo variants in SETD1B are  
590 associated with intellectual disability, epilepsy and autism. *Hum Genet* 137: 95-  
591 104  
592 Hughes C, M., Rozenblatt-Rosenm O, Milnem T A, Copelandm T D, Levinemm S.S,  
593 Lee JC, Hayes DN, Shanmugam KS, Bhattacharjee A, Biondi CA *et al* (2004) Menin  
594 associates with a trithorax family histone methyltransferase complex and with  
595 the hoxc8 locus. *Mol Cell*: 4  
596 Illouz T, Madar R, Louzon Y, Griffioen KJ, Okun E (2016) Unraveling cognitive  
597 traits using the Morris water maze unbiased strategy classification (MUST-C)  
598 algorithm. *Brain Behav Immun* 52: 132-144  
599 Josselyn SA KS, Frankland PW. Finding the engram. *Nat Rev Neurosci*.  
600 2015;16(9):521-534. doi:10.1038/nrn4000 (2019) Finding the engram. *Nat Rev*  
601 *Neurosci* 16: 521-534



- 602 Kerimoglu C, Agis-Balboa RC, Kranz A, Stilling R, Bahari-Javan S, Benito-  
603 Garagorri E, Halder R, Burkhardt S, Stewart AF, Fischer A (2013) Histone-  
604 methyltransferase mll2 (kmt2b) is required for memory formation in mice. *J*  
605 *Neurosci* 33: 3452-3464
- 606 Kerimoglu C, Sakib M, Jain G, Benito E, Burkhardt S, Capece V, Kaurani L, Halder  
607 R, Agis-Balboa R, Stilling R *et al* (2017a) KMT2A and KMT2B mediate memory  
608 function by affecting distinct genomic regions. *Cell Rep* 20: 538-548
- 609 Kerimoglu C, Sakib MS, Jain G, Benito E, Burkhardt S, Capece V, Kaurani L, Halder  
610 R, Agis-Balboa RC, Stilling R *et al* (2017b) KMT2A and KMT2B Mediate Memory  
611 Function by Affecting Distinct Genomic Regions. *Cell reports* 20: 538-548
- 612 Kleefstra T, Schenck A, Kramer JM, van Bokhoven H (2014) The genetics of  
613 cognitive epigenetics. *Neuropharmacology* 80: 83-94
- 614 Kuczera T, Stilling RM, Hsia HE, Bahari-Javan S, Irniger S, Nasmyth K,  
615 Sananbenesi F, Fischer A (2010) The anaphase promoting complex is required  
616 for memory function in mice. *Learn Mem* 18: 49-57
- 617 Labonne JD, Lee KH, Iwase S, Kong IK, Diamond MP, Layman LC, Kim CH, Kim HG  
618 (2016) An atypical 12q24.31 microdeletion implicates six genes including a  
619 histone demethylase KDM2B and a histone methyltransferase SETD1B in  
620 syndromic intellectual disability. *Hum Genet* 135: 757-771
- 621 Lee S, Lee DK, Dou Y, Lee J, Lee B, Kwak E, Kong YY, Lee SK, Roeder RG, Lee JW  
622 (2006) Coactivator as a target gene specificity determinant for histone H3 lysine  
623 4 methyltransferases. *Proc Natl Acad Sci U S A* 103: 15392-15397
- 624 Lin H, Min Z, Tao Q (2016) The MLL/Setd1b methyltransferase is required for  
625 the Spemann's organizer gene activation in Xenopus. *Mech Dev* 142
- 626 Ma M, Zhang Y, Weng M, Hu Y, Xuan Y, Hu Y, Lv K (2018) lncRNA GCAWKR  
627 Promotes Gastric Cancer Development by Scaffolding the Chromatin  
628 Modification Factors WDR5 and KAT2A. *Mol Ther* 26: 2658-2668.
- 629 Mukai J, Cannavò E, Crabtree GW, Sun Z, Diamantopoulou A, Thakur P, Chang CY,  
630 Cai Y, Lomvardas S, Takata A *et al* (2019). Recapitulation and Reversal of  
631 Schizophrenia-Related Phenotypes in Setd1a-Deficient Mice. *Neuron*. *Neuron*  
632 104: 471-487
- 633 Nestler EJ, Peña CJ, Kundakovic M, Mitchell A, Akbarian S (2015) Epigenetic Basis  
634 of Mental Illness. *Neuroscientist* 8
- 635 Reijmers LG, Perkins BL, Matsuo N, Mayford M (2007) Localization of a stable  
636 neural correlate of associative memory. *Science* 317: 1230-1233
- 637 Scacheri PC, Davis S, Odom DT, Crawford GE, Perkins S, Halawi MJ, Agarwal SK,  
638 Marx SJ, Spiegel AM, Meltzer PS *et al* (2006) Genome-wide analysis of menin  
639 binding provides insights into MEN1 tumorigenesis. *PLoS Genet* 2: e51
- 640 Schmidt K, Zhang Q, Tasdogan A, Petzold A, Dahl A, Arneth BM, Slany R, Fehling  
641 HJ, Kranz A, Stewart AF *et al* (2018) The histone 3 lysine 4 methyltransferase  
642 Setd1b is essential for hematopoietic stem and progenitor cell homeostasis in  
643 mice. *eLife* 7
- 644 Shilatifard A (2012) The COMPASS family of histone H3K4 methylases:  
645 mechanisms of regulation in development and disease pathogenesis. *Annual*  
646 *reviews of Biochemistry* 81: 65-95
- 647 Shulha HP, Cheung I, Whittle C, Wang J, Virgil D, Lin CL, Guo Y, Lessard A,  
648 Akbarian S, Weng Z (2012) Epigenetic signatures of autism: trimethylated H3K4  
649 landscapes in prefrontal neurons. *Arch Gen Psychiatry* 69: 314-324

650 Singh T KM, Curtis D, Purcell SM, Crooks L, McRae J, Suvisaari J,, Chheda H BD,  
651 Breen G, Pietiläinen O, Gerety SS, Ayub M, Blyth M, Cole, T CD, Coomber EL,  
652 Craddock N, Daly MJ, Danesh J, DiForti M, Foster A,, Freimer NB GD, Johnstone M,  
653 Joss S, Kirov G, Kõrkkö J, Kuismin O,, Holmans P HC, Iyegbe C, Lönnqvist J,  
654 Männikkö M, McCarroll SA, McGuffin , P MA, McQuillin A, Moilanen JS, Moore C,  
655 Murray RM, Newbury-Ecob R,, Ouwehand W PT, Prigmore E, Rees E, Roberts D,  
656 Sambrook J, Sklar P, St, Clair D VJ, Walters JT, Williams H; Swedish Schizophrenia  
657 Study; INTERVAL, Study; DDD Study; UK10 K Consortium SP, Hurles ME,  
658 O'Donovan MC,, Palotie A OM, Barrett JC. (2016) Rare loss-of-function variants in  
659 SETD1A are associated with schizophrenia and developmental disorders. *Nat*  
660 *Neurosci* 19: 571-577  
661 Soares LM, He PC, Chun Y, Suh H, Kim T, Buratowski S (2017) Determinants of  
662 Histone H3K4 Methylation Patterns. *Molecular cell. Molecular cell* 68: 773–785  
663 Stilling R, Rönicke R, Benito-Garagorri E, Urbanke H, Capece V, Burckhard S,  
664 Bahari-Javan S, Barth J, Sananbenesi F, Schütz AL *et al* (2014) K-Lysine  
665 acetyltransferase 2A regulates a hippocampal gene-expression network linked to  
666 memory formation. *EMBO J* 33: 1912-1927  
667 Sze CC, Ozakr PA, Cao K, Ugarenko M, Das S, Wang L, Marshall SA, Rendleman EJ,  
668 Ryan CA, Zha D *et al* (2020) Coordinated regulation of cellular identity-  
669 associated H3K4me3 breadth by the COMPASS family. *Science Advances* 6  
670 Takata A, Ionita-Laza I, Gogos JA, Xu B, Karayiorgou M (2016) De Novo  
671 Synonymous Mutations in Regulatory Elements Contribute to the Genetic  
672 Etiology of Autism and Schizophrenia. *Neuron* 89: 940-947  
673 Tonegawa S, Morrissey MD, Kitamura T (2018) The role of engram cells in the  
674 systems consolidation of memory. *Nature reviews Neuroscience*, 19: 485–498.  
675 Wang Z, Zang C, Cui K, Schones DE, Barski A, Peng W, Zhao K (2009) Genome-  
676 wide mapping of HATs and HDACs reveals distinct functions in active and  
677 inactive genes. *Cell* 138: 1019-1031  
678 Wolf FA, Angerer P, Theis FJ (2018) SCANPY: large-scale single-cell gene  
679 expression data analysis. *. Genome biology* 19: 15  
680 Yokoyama A, Wang Z, Wysocka J, Sanyal M, Aufiero DJ, Kitabayashi I, Herr W,  
681 Cleary ML (2004) Leukemia proto-oncoprotein MLL forms a SET1-like histone  
682 methyltransferase complex with menin to regulate Hox gene expression.  
683 *Molecular and cellular biology. Molecular and cellular biology* 24: 5639-5649  
684  
685

## 686 **Acknowledgments**

687 This work was supported by the following third party funds to AF: The ERC consolidator  
688 grant DEPICODE (648898), the BMBF projects ENERGI (01GQ1421A) and Intergrament  
689 (01ZX1314D), and funds from the German Center for Neurodegenerative Diseases FS was  
690 supported by the DFG grant SA1005/2-1 and funds from the DZNE. AM is a student of the  
691 International Max Planck Research School (IMPRS) for Genome Science. SS& RI are  
692 students of the IMPRS for Neuroscience.

693

## 694 **Author contributions**

695 AM initiated the project as part of her PhD thesis, performed behavior experiments,  
696 performed and analyzed immunohistochemistry and analyzed mutant mice; SS generated cell-  
697 type specific CHIP/RNA-seq and single nucleus RNA-seq data and contributed to the analysis  
698 of cell type specific RNA-seq, CK analyzed and interpreted ChIP-seq and RNA-seq data and  
699 supervised all bioinformatic data analysis, DMF analyzed single nucleus RNA-seq data, LK,  
700 XX & EMZ helped with the generation of single nucleus RNA-seq; AK & FAS provided  
701 material and analyzed data, AM, SS, CK and AF designed experiments and generated  
702 figures. CK and AF wrote the paper.

703

704 **Competing interests**

705 The authors declare no competing interests

706

707

708 **Figure legends**

709

710 **Figure 1. *Setd1b* is required for hippocampus-dependent memory.** **A.** qPCR analysis  
711 shows loss of *Setd1b* in forebrain regions while levels in the cerebellum are not affected (CA:  
712 Control, n = 6; cKO, n = 6. DG: Control, n = 6; cKO, n = 6. Cortex: Control, n = 7; cKO, n =  
713 7. Cerebellum: Control, n = 4; cKO, n = 4). \* *p*-value < 0.05 (Student t-test). **B.** Immunoblot  
714 analysis shows loss of SETD1B in the hippocampus of *Setd1b* cKO mice (Control, n = 4;  
715 cKO, n = 4). \*\* *p*-value < 0.01 (Student t-test). **C.** Immunohistochemical staining (upper  
716 level) for marker proteins of neuronal integrity and quantification (lower panel) shows no  
717 difference in control and *Setd1b* cKO mice (NeuN: Control, n = 6; cKO, n = 6; Student t-test  
718 *p*-value = 0.57. MAP2: Control, n = 4; cKO, n = 4; Student t-test *p*-value = 0.72. Iba1:  
719 Control, n = 5; cKO, n = 5; Student t-test *p*-value = 0.8. Gfap: Control, n = 5; cKO, n = 5;  
720 Student t-test *p*-value = 0.09.). Scale bar: 100  $\mu$ m. **D.** Average speed (left panel) and time  
721 spent in the center (right) panel during exposure to the open field test was similar in control  
722 and *Setd1b* cKO mice (Average speed: Control, n = 15; cKO, n = 15; Student t-test *p*-value =  
723 0.075. Time spent in center: Control, n = 15; cKO, n = 15; Student t-test *p*-value = 0.96). **E.**  
724 Short term memory was not affected in control and *Setd1b* cKO mice as indicated by similar  
725 percent of alternations in the Y-maze test (Control, n = 15; cKO, n = 15; Student t-test *p*-  
726 value = 0.3). **F.** Escape latency during water maze training indicated severe learning  
727 impairment in *Setd1b* cKO mice (Control: n = 15, cKO: n = 15. Repeated measures ANOVA,  
728 genotype effect:  $F(1,28) = 82.34$ , \*\*\*\* *p*-value < 0.0001). **G.** Plots showing the specific  
729 search strategies during water maze training. Note the failure of *Setd1b* cKO mice to adapt  
730 hippocampus-dependent search strategies. **H.** The cognitive score calculated on the basis of  
731 the hippocampal search strategies is severely impaired in *Setd1b* cKO mice (Student t-test:  
732 \*\*\* *p*-value < 0.001). **I.** Time spent in the target quadrant during the probe test is impaired in  
733 *Setd1b* cKO mice (Control: n = 15, cKO: n = 15. \*\*\*\* Student t-test < 0.0001). Error bars  
734 indicate SEM.

735

736 **Figure 2. *Setd1b* controls histone-methylation and H3K4me3 peak width.** **A.**  
737 Experimental scheme showing our approach to perform cell-type specific ChIP-seq and  
738 RNA-seq. For Chip-Seq we employed n = 4 for control and n = 4 from *Setd1b* cKO. **B.** Left  
739 panel: Heat map showing genes with significantly differing H3K4me3 sites at the TSS (+/-  
740 2kb) in *Setd1b* cKO mice and the overall genomic locations of altered H3K4me3 levels. Right  
741 panel shows the same analysis for H3K4me1 (FDR < 0.05 & |fold change| > 1.5). **C.** Bar plot  
742 showing the number of genes with decreased and increased H3K4me3 and H3K4me1 at the  
743 TSS region in *Setd1b* cKO mice (FDR < 0.05 & |fold change| > 1.5). **D.** NGS plot showing  
744 H3K4me3 across all genes with significantly reduced H3K4me3 in *Setd1b* cKO mice. Left

745 panel shows a bar chart indicating that reduced H3K4me3 in *Setd1b* cKO mice is mainly  
746 occurring downstream of the TSS (\*\*\*) Student t-test  $p$ -value < 0.001). **E.** NGS plots showing  
747 the distribution of H3K4me3 and H3K4me1 at the close vicinity of TSS of genes that show  
748 significantly reduced H3K4me3 and increased H3K4me1 in *Setd1b* cKO mice. Bar graphs on  
749 the left show corresponding quantification (Student t-test: \*\*  $p$ -value < 0.01, \*\*\*\*  $p$ -value <  
750 0.0001). **F.** NGS plot showing the distribution of H3K4me3 and H3K4me1 at the TSS of  
751 genes that show both reduced H3K4me3 and H3K4me1 in *Setd1b* cKO mice. Bar graphs on  
752 the left show corresponding quantification (Student t-test: \*  $p$ -value < 0.05, \*\*\*\*  $p$ -value <  
753 0.0001). **G.** Heatmap (left panel) showing basal state H3K4me3 peak width for genes  
754 characterized by decreased H3K4me3 in combination with either increased or decreased  
755 H3K4me1 in *Setd1b* cKO mice. Right panel: Quantification of the peak width in genes with  
756 decreased H3K4me3 in combination with either increased, decreased or not altered H3K4me1  
757 in *Setd1b* cKO mice (One-way ANOVA:  $p$ -value < 0.0001. Post-hoc multiple comparisons,  
758 Tukey's test: increased H3K4me1 vs no change H3K4me1, \*\*\*\*  $p$ -value < 0.0001; increased  
759 H3K4me1 vs decreased H3K4me1, \*\*\*\*  $p$ -value < 0.0001; no change H3K4me1 vs  
760 decreased H3K4me1, §§§§  $p$ -value < 0.0001). **H.** Bar graph showing the basal wild type  
761 expression level for the 3 categories of genes that display altered H3K4me3 in *Setd1b* cKO  
762 mice. Please note that basal expression level is highest for genes with decreased H3K4me3 in  
763 combination with increased H3K4me1 that are characterized by broad H3K4me3 peaks (One-  
764 way ANOVA:  $p$ -value < 0.0001. Post-hoc multiple comparisons, Tukey's test: increased  
765 H3K4me1 vs no change H3K4me1, \*\*\*\*  $p$ -value < 0.0001; increased H3K4me1 vs decreased  
766 H3K4me1, \*\*\*\*  $p$ -value < 0.0001; no change H3K4me1 vs decreased H3K4me1,  $p$ -value =  
767 0.6967). **I.** Heat map showing functional pathways for the 3 categories of genes affected by  
768 reduced H3K4me3 in *Setd1b* cKO mice. Error bars indicate SEM.

769

770 **Figure 3. Hippocampal *Setd1b* controls highly expressed learning and memory genes**  
771 **characterized by a broad H3K4me3 peak.** **A.** Volcano plot showing genes differentially  
772 expressed in hippocampal neurons of *Setd1b* cKO mice.  $n = 3$ /group. **B.** NGS plots showing  
773 H3K4me3 and H3K4me1 at the TSS of genes down-regulated in *Setd1b* cKO mice. Bar plots  
774 (right panel) show quantification. **C.** *Arpp21* (CAMP Regulated Phosphoprotein 21) was  
775 selected as a representative gene down-regulated in hippocampal neurons of *Setd1b* cKO  
776 mice to illustrate changes of the analyzed histone-modifications. Please note that the  
777 H3K4me3 peak-width is substantially shrinking in *Setd1b* cKO mice. At the same time there  
778 is an obvious increase of H3K4me1 at the TSS of *Arpp21* in *Setd1b* cKO mice. **D.** NGS plots  
779 showing H3K4me3 and H3K4me1 at the TSS of a random set of genes that were not altered  
780 in *Setd1b* cKO mice. Bar plot (right panel) show quantification. **E.** Left panel: H3K4me3  
781 peaks are significantly broader in genes that are down-regulated in *Setd1b* cKO mice, when

782 compared to a random set of genes that were unaffected. Right panel: Genes down-regulated  
783 in *Setd1b* cKO mice are characterized by higher baseline expression when compared to a  
784 random set of genes that were unaffected. **F.** Heat map showing functional pathways affected  
785 by genes down-regulated in *Setd1b* cKO mice. Error bars indicate SEM.  
786 Student t-test: \*  $p$ -value < 0.05, \*\*\*\*  $p$ -value < 0.0001

787

788 **Figure 4. Comparative analysis of the hippocampal transcriptome in *Setd1b*, *Kmt2a* and**  
789 ***Kmt2b* cKO mice. A.** Bar chart showing the number of genes that exhibit significantly altered  
790 H3K4me3 at the TSS (*Kmt2a*: control,  $n = 5$ ; cKO,  $n = 3$ . *Kmt2b*: control,  $n = 6$ ; cKO,  $n = 5$ .  
791 *Setd1b*: control,  $n = 4$ ; cKO,  $n = 4$ ). **B.** Bar chart showing the number of genes that exhibit  
792 significantly altered H3K4me1 at the TSS. **C.** Venn diagram comparing the genes with  
793 significantly decreased H3K4me3 at the TSS amongst in the 3 respective cKO mice. **D.** Bar  
794 chart showing the number of differentially expressed genes from bulk RNA-seq in each of the  
795 3 KMT cKO mice. *Kmt2a*: control,  $n = 5$ ; cKO,  $n = 6$ . *Kmt2b*: control,  $n = 8$ ; cKO,  $n = 11$ .  
796 *Setd1b*: control,  $n = 6$ ; cKO,  $n = 6$ ) **E.** Venn diagram comparing the significantly down-  
797 regulated genes H3K4me3 amongst the 3 respective cKO mice. **F.** Down-regulated genes  
798 with decreased H3K4me3 in each of the 3 KMT cKO mice were tested for the overlap to the  
799 836 neuronal identity genes we had defined for the hippocampal CA region (See Fig S2).  
800 Only for *Setd1b* cKO mice a highly significant odds ratio (Fisher's exact test) was observed,  
801 while there was no significant association amongst neuronal identity genes and the genes  
802 affected in *Kmt2a* and *Kmt2b* cKO mice. **G.** Left panel: Bar graphs showing H3K4me3  
803 binding around the TSS of downregulated genes exhibiting significantly decreased H3K4me3  
804 in either of the 3 KMT cKO mice (Two-way ANOVA: \*  $p$ -value < 0.05, \*\*\*  $p$ -value <  
805 0.001). Right panel depicts H3K4me1 for the same TSS regions (Two-way ANOVA \*\*\*\*  $p$ -  
806 value < 0.0001). Note that only in *Setd1b* cKO mice decreased H3K4me3 is accompanied by  
807 significantly increased H3K4me1. **H.** Genes exhibiting decreased H3K4me3 and reduced  
808 expression in *Kmt2a*, *Kmt2b* or *Setd1b* cKO mice were analyzed for H3K4me3 peak-width at  
809 the TSS under basal conditions. Genes affected in *Setd1b* cKO mice displayed significantly  
810 broader H3K4me3 peak-width when compared to genes down-regulated in *Kmt2a* or *Kmt2b*  
811 cKO mice. H3K4me3 peak-width at unchanged genes are shown for comparison. **I.** Bar  
812 graphs showing average basal expression of genes down-regulated with decreased H3K4me3  
813 levels at the TSS in *Kmt2a*, *Kmt2b* or *Setd1b* cKO mice. Genes affected in *Setd1b* cKO mice are  
814 expressed at significantly higher levels und basal conditions when compared to genes affected  
815 in *Kmt2a* or *Kmt2b* cKO mice. **J.** Heat map showing functional pathways of genes affected in  
816 *Kmt2a*, *Kmt2b* or *Setd1b* cKO mice. Note that genes affected by loss of *Setd1b* specifically  
817 represent pathways linked to neuronal function. Error bars indicate SEM.

818

819 **Figure 5. *Kmt2*, *Kmt2b* and *Setd1b* expression at the single cell level reveals a specific**  
820 **role for *Setd1b*.** **A.** Bar graph showing the expression of *Kmt2*, *Kmt2b* and *Setd1b* expression  
821 in neuronal nuclei from the hippocampal CA region n = 3798. **B.** Experimental scheme for  
822 the single nuclei RNAseq experiment. **C.** UMAP plot showing the data from 3798 neuronal  
823 nuclei. **D.** UMAP plot showing the clustering of 2619 nuclei from hippocampal excitatory CA  
824 neurons indicating the normalized expression of *Setd1b* (left panel), *Kmt2a* (middle panel)  
825 and *Kmt2b* (right panel). **E.** Bar graph showing the normalized expression of *Kmt2*, *Kmt2b*  
826 and *Setd1b* in the respective positive cells. Note that the absolute expression amongst the 3  
827 KMTs in the respective positive cells is not different. **F.** Number of nuclei positive for of the  
828 *Kmt2a*, *Kmt2b* or *Setd1b* in our dataset. **G.** We performed a differential expression analysis  
829 for *Kmt2a*, *Kmt2b* and *Setd1b* positive nuclei vs. the nuclei that did not express the  
830 corresponding KMT. Left panel: The bar graph shows the fold change of genes significantly  
831 increased in either *Kmt2a*, *Kmt2b* or *Setd1b* positive nuclei. The number in the bars refer to  
832 the number of differentially expressed genes. Please note that the majority of the genes  
833 significantly enriched in *Kmt2a* (+) cells exhibit a rather low fold change, while this is the  
834 opposite for *Setd1b* (+) cells. White number within the individual plotted genes indicate the  
835 percentage of genes that are significantly increased in *Kmt2a*, *Kmt2b* or *Setd1b* positive nuclei  
836 by a fold change greater than 1.5. Right panel: Venn diagram comparing the genes  
837 significantly increased in *Kmt2a*, *Kmt2b* or *Setd1b* positive nuclei with a fold change above  
838 1.5 (upper diagram) or below a fold change of 1.5 (lower diagram). **H.** Top GO and Kegg  
839 pathways representing the genes increased in *Setd1b* positive nuclei. For comparison the  
840 enrichment of the same GO-terms/pathways is shown for genes enriched in *Kmt2a* or *Kmt2b*  
841 positive nuclei. **I.** Violin plot showing the eigen-value of the gene significantly altered when  
842 comparing *Setd1b* (+) to *Setd1b* (-) cells in *Setd1b* (+), *Setd1b* (-), *Kmt2a* (+) and *Kmt2b* (+)  
843 cells. Please note that this *Setd1b* specific gene-set is also significantly higher expressed when  
844 compared to *Kmt2a* or *Kmt2b* positive cells (One-way ANOVA  $P < 0.0001$ ;  $F = 61.62$ ;  
845 asterisks indicate unpaired t-Test;  $***P < 0.001$ )

846

#### 847 **Expanded View Figure Legends**

848

849 **Expanded view Fig 1. Behavioral analysis of mice expressing CamKII-driven Cre**  
850 **recombinase.** **A.** Transgenic mice expressing CRE under control of the CamKII promoter  
851 were subjected to behavior testing (n=8, Cre +) comparing them to wild type mice from the  
852 same breeding colony that did not express CRE (n=8; Cre -). No difference was observed in  
853 body weight. **B.** The distance traveled in the open field test and **(C)** the time spent in the  
854 center of the arena was similar amongst groups. **D.** No difference in the swimming speed was  
855 observed amongst groups when subjected to the water maze test. **E.** Escape latency during  
856 water maze training was similar in CRE - and CRE + mice. **F.** During the probe test  
857 performed after 10 trainings days, CRE - and CRE + mice showed similar performance then

858 time spent in the target quadrant and **(G)** the number of platform crossings were analyzed.  
859 Error bars indicate SEM.

860 **Expanded view Fig 2: Sorting neuronal and non-neuronal nuclei for RNA-analysis.**

861 Nuclei from the hippocampal CA region were subjected to FACS as depicted in Fig 2A. **A.**  
862 Representative images showing nuclei that were sorted using the neuronal marker NeuN.  
863 Note that no NeuN positive nuclei are detected in the NeuN (-) fraction confirming the purity  
864 of the approach. Scale bar: 50 $\mu$ m **C.** Gating strategy for NeuN (+) and NeuN (-) nuclei  
865 sorting. **C.** RNA-sequencing (n=2/group) was performed from NeuN (+) and NeuN (-) nuclei  
866 and a differential expression analysis was performed. Heat map shows 836 genes specifically  
867 enriched in NeuN (+) nuclei when compared to NeuN (-) nuclei. The criteria to select those  
868 genes were: adjusted p value <0.01, basemean >150, fold change > 5. **D.** GO-term analysis  
869 showing that the top 10 enriched biological processes and molecular functions for the 836  
870 genes enriched in NeuN (+) nuclei all represent specific neuronal processes. **E.** Normalized  
871 expression values obtained from the RNA-seq experiment showing the expression of selected  
872 genes known to be enriched in neurons. **F.** Normalized expression values of genes that are  
873 known to be enriched in non-neuronal cells including glia cells. Error bars indicate SEM.  
874

875 **Expanded view Fig. 3. Decreased H3K9ac and H3K27ac in *Setd1b* cKO mice.** **A.** Left

876 panel: Heat map showing genes with differential H3K9ac sites at the TSS in neuronal nuclei  
877 from *Setd1b* cKO mice and their genomic location. Right panel shows the same analysis for  
878 H3K27ac. **B.** Bar chart showing the number of genes with decreased and increased H3K9ac  
879 and H3K27ac marks at the TSS region. Data for H3K4me3 and H3K4me1 are shown for  
880 comparison. As expected, the most affected histone-mark is H3K4me3. **C.** Venn diagram  
881 showing that most of the sites exhibiting decreased H3K9ac at the TSS also exhibit reduced  
882 H3K4me3, while this was not the case for H3K27ac. TSS, transcription start site.  
883

884 **Expanded view Fig 4. Comparison of gene-expression changes in *Setd1b* cKO mice**  
885 **detected from cell-type specific and bulk tissue RNA-seq.** Venn diagram showing the

886 overlap of genes down-regulated in *Setd1b* cKO mice detected via RNA-seq from neuronal  
887 nuclei or bulk hippocampal CA tissue. Please note that more genes are detected when  
888 neuronal nuclei are analyzed suggesting that some of the difference are masked by cell type  
889 heterogeneity when bulk tissue is analyzed.  
890

891 **Expanded view Fig. 5. Comparison of the genes down-regulated in *Setd1A* and *Setd1b***  
892 **mutant mice.** Venn diagram showing genes down-regulated in *Setd1A* vs *Setd1b* cKO mice.

893 Please note that genes affected in the different mutant mice are very different. Of course, care  
894 has to be taken since the data from *Setd1A* mutant mice stems from a recent publication by  
895 Mukai et al., 2019 (PMID:31606247). In this study cortical tissue from heterozygous mice  
896 constitutively lacking *Setd1A* were analyzed, while our data stems from the hippocampus of  
897 conditional knock out mice.  
898

899 **Expanded view Fig. 6. Functional pathways affected in *Kmt2a* and *Kmt2b* cKO mice.** **A.**

900 Heat map showing functional pathways analysis for genes down-regulated in *Kmt2a* cKO  
901 mice. Enrichment of the same pathways is also shown for *Kmt2b* and *Setd1b* cKO mice. **B.**  
902 Heat map showing functional pathways analysis for genes down-regulated in *Kmt2b* cKO  
903 mice. Enrichment of the same pathways is also show for *Kmt2a* and *Setd1b* cKO mice. Please  
904 note that the pathways affected in *Kmt2a* or *Kmt2b* cKO mice differ substantially from those



905 affected in *Setd1b* cKO mice. All data is based on comparable RNA-seq data generated from  
906 bulk hippocampal CA1 region.

907 **Expanded view Fig. 7. Spatial reference learning in *Kmt2a*, *Kmt2b* and *Setd1b* cKO mice.**

908 To compare spatial reference learning in the 3 different mutant mice, we normalized the data  
909 to the corresponding control group. This is important, since the experiments were performed  
910 at different time points. The data on *Kmt2a* and *Kmt2b* cKO mice was generated in our  
911 laboratory and is already published (Kerimoglu *et al.*, 2013) (Kerimoglu *et al.*, 2017a). The  
912 data on *Setd1b* cKO mice were generated as part of this project using the same protocol. In  
913 this plot an increase in the normalized escape latency shows the difference to the  
914 corresponding control group. Hence, a higher normalized escape latency indicates a greater  
915 difference to the corresponding control and this more severe learning impairment. This  
916 difference in normalized escape latency is significantly greater in *Setd1b* cKO mice when  
917 compared to *Kmt2a* or *Kmt2b* cKO mice. It is interesting to note that the degree of memory  
918 impairment seems to parallel the gene-expression data, hence *Setd1* appears to be most  
919 important for the expression of neuronal identity genes linked to learning and memory *Setd1b*  
920 cKO mice are also most affected in spatial memory formation. Loss of *Kmt2a* affects some  
921 pathways specific to neuronal function but also more general cellular processes while loss of  
922 *Kmt2b* seem to affect genes that are not specific to neuronal function. In line with this, loss of  
923 *Kmt2b* has the least effect on spatial memory and in fact memory defects in *Kmt2b* cKO mice  
924 only become obvious during prolonged training and the probe test<sup>23</sup>. *Setd1b* cKO (n = 14) vs  
925 *Kmt2a* cKO (n = 13): Repeated measures ANOVA, genotype effect: F (1,25) = 16.83, \*\*\* *p*-  
926 value < 0.001. *Setd1b* cKO (n = 14) vs *Kmt2b* cKO (n = 22): Repeated measures ANOVA,  
927 genotype effect: F (1,34) = 70.66, \*\*\*\* *p*-value < 0.0001.

928  
929  
930

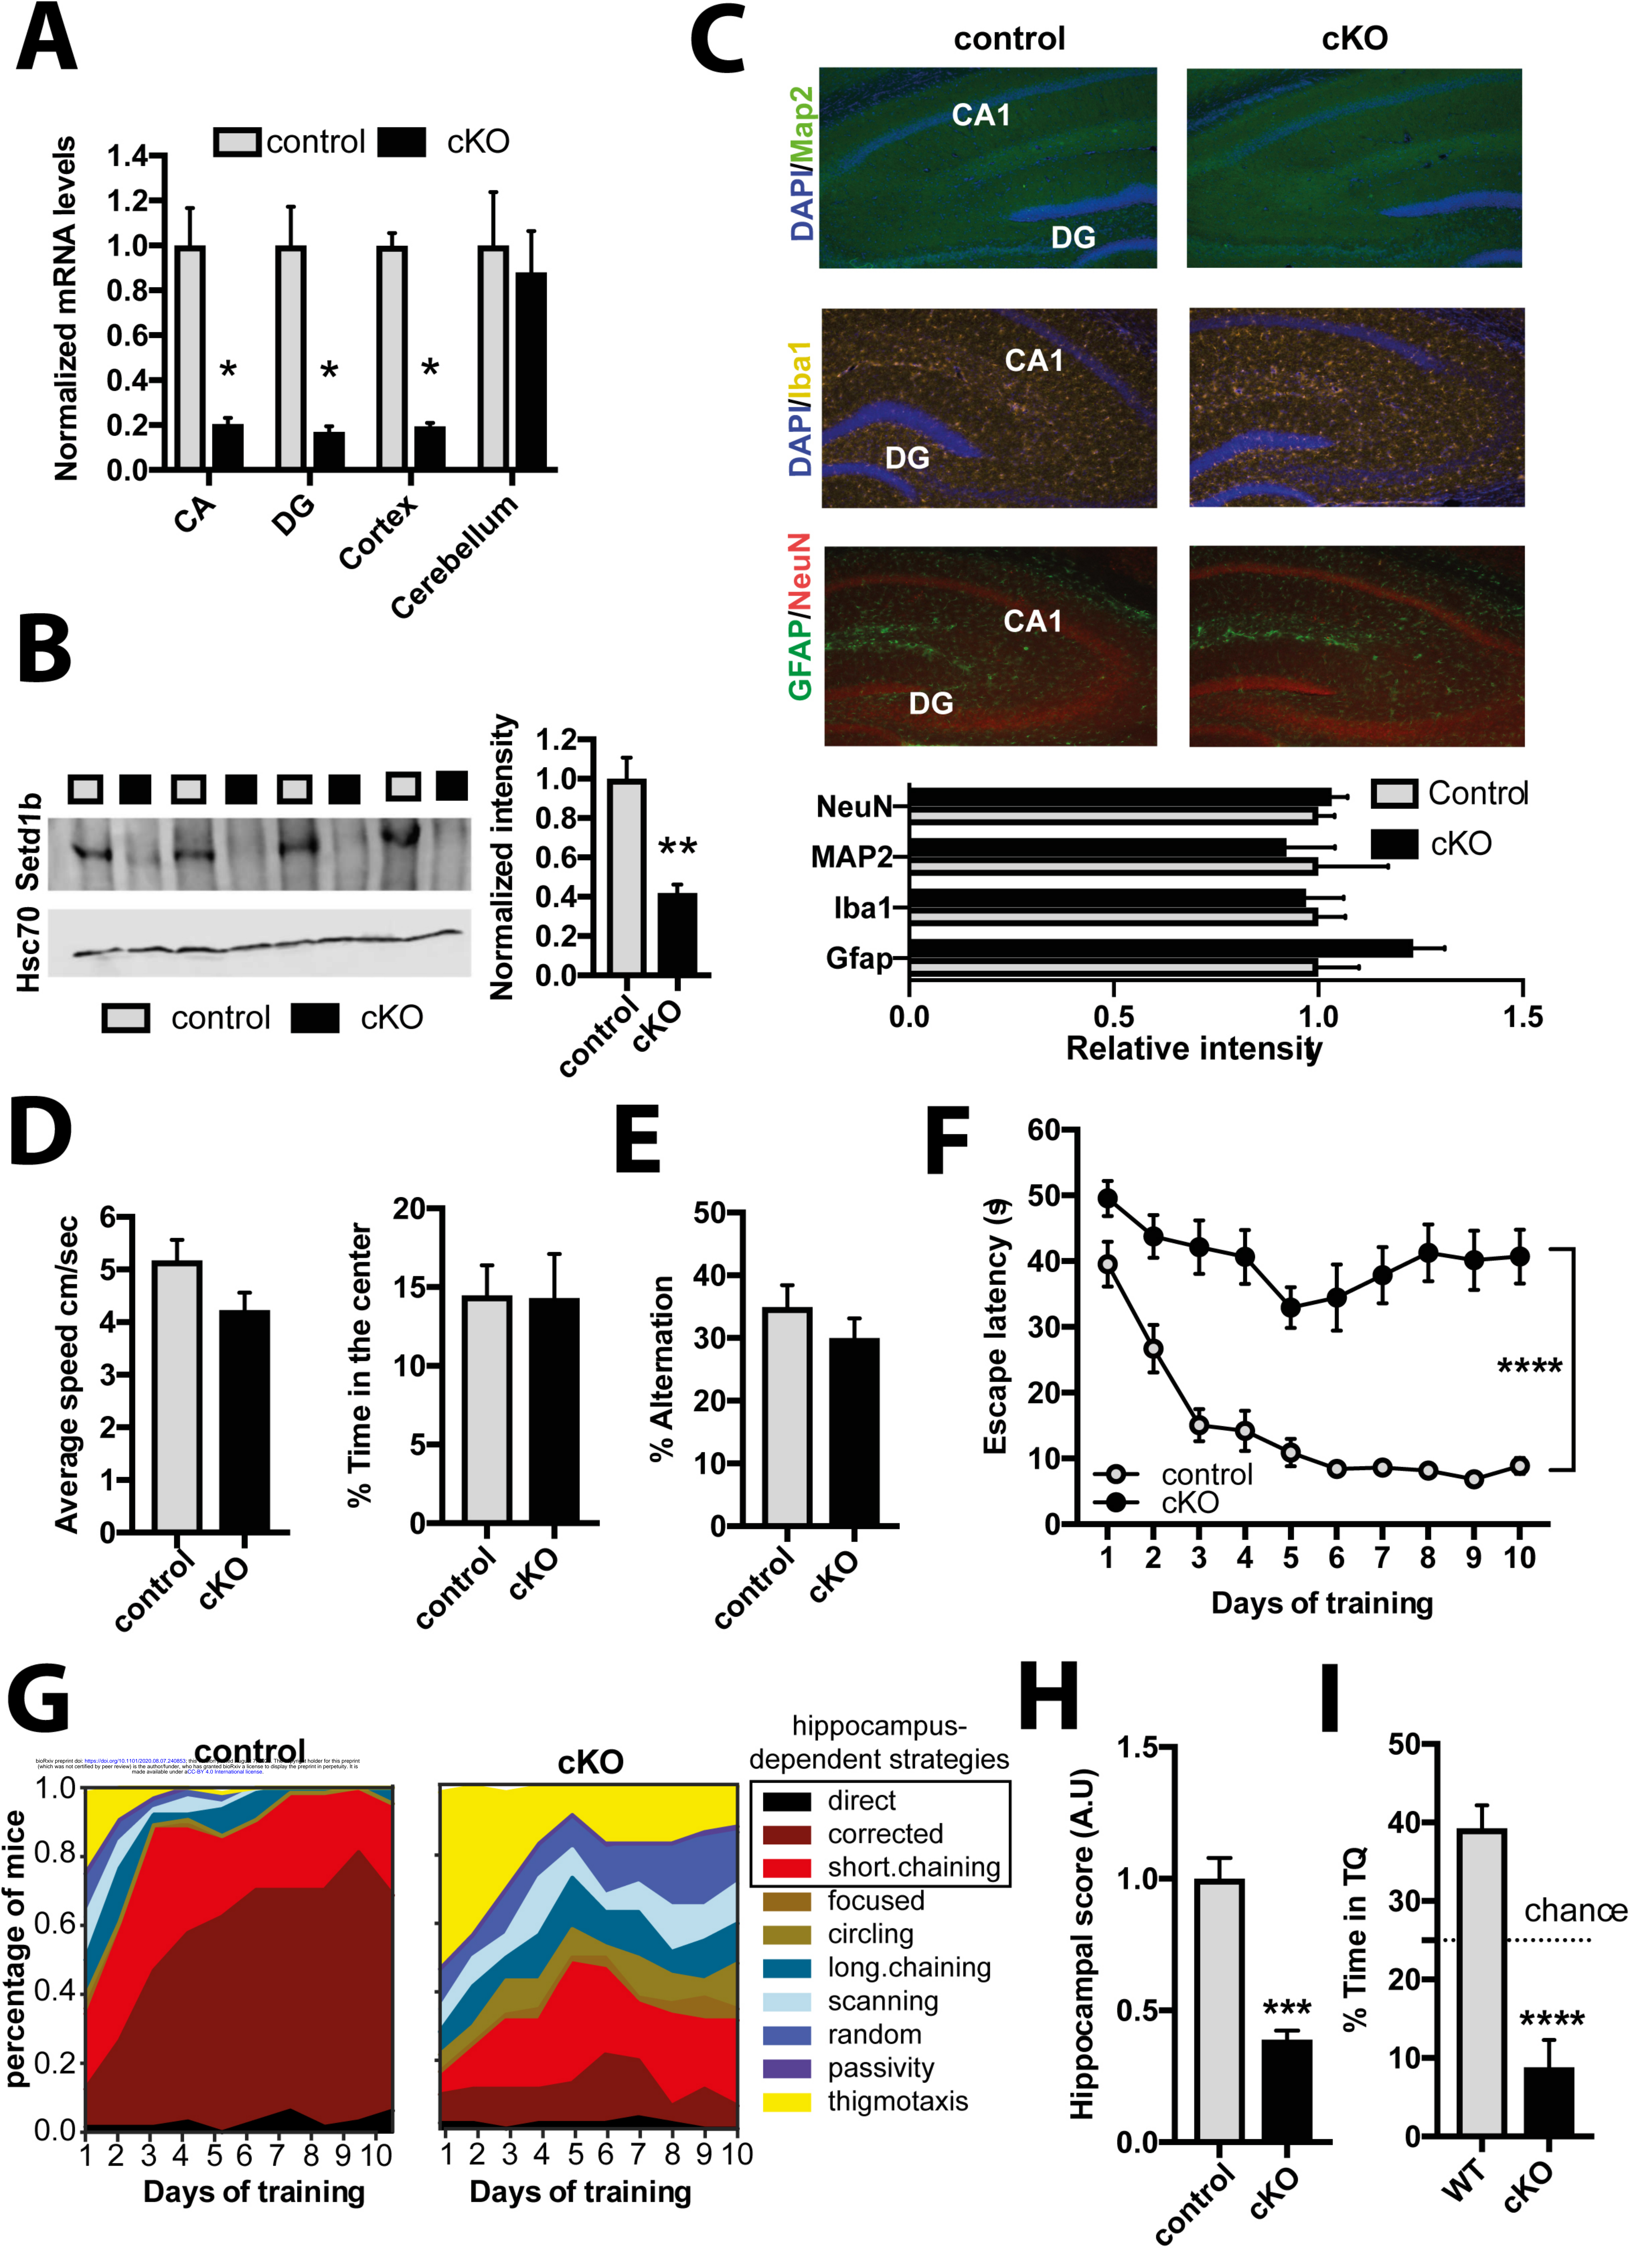

**Figure 1**

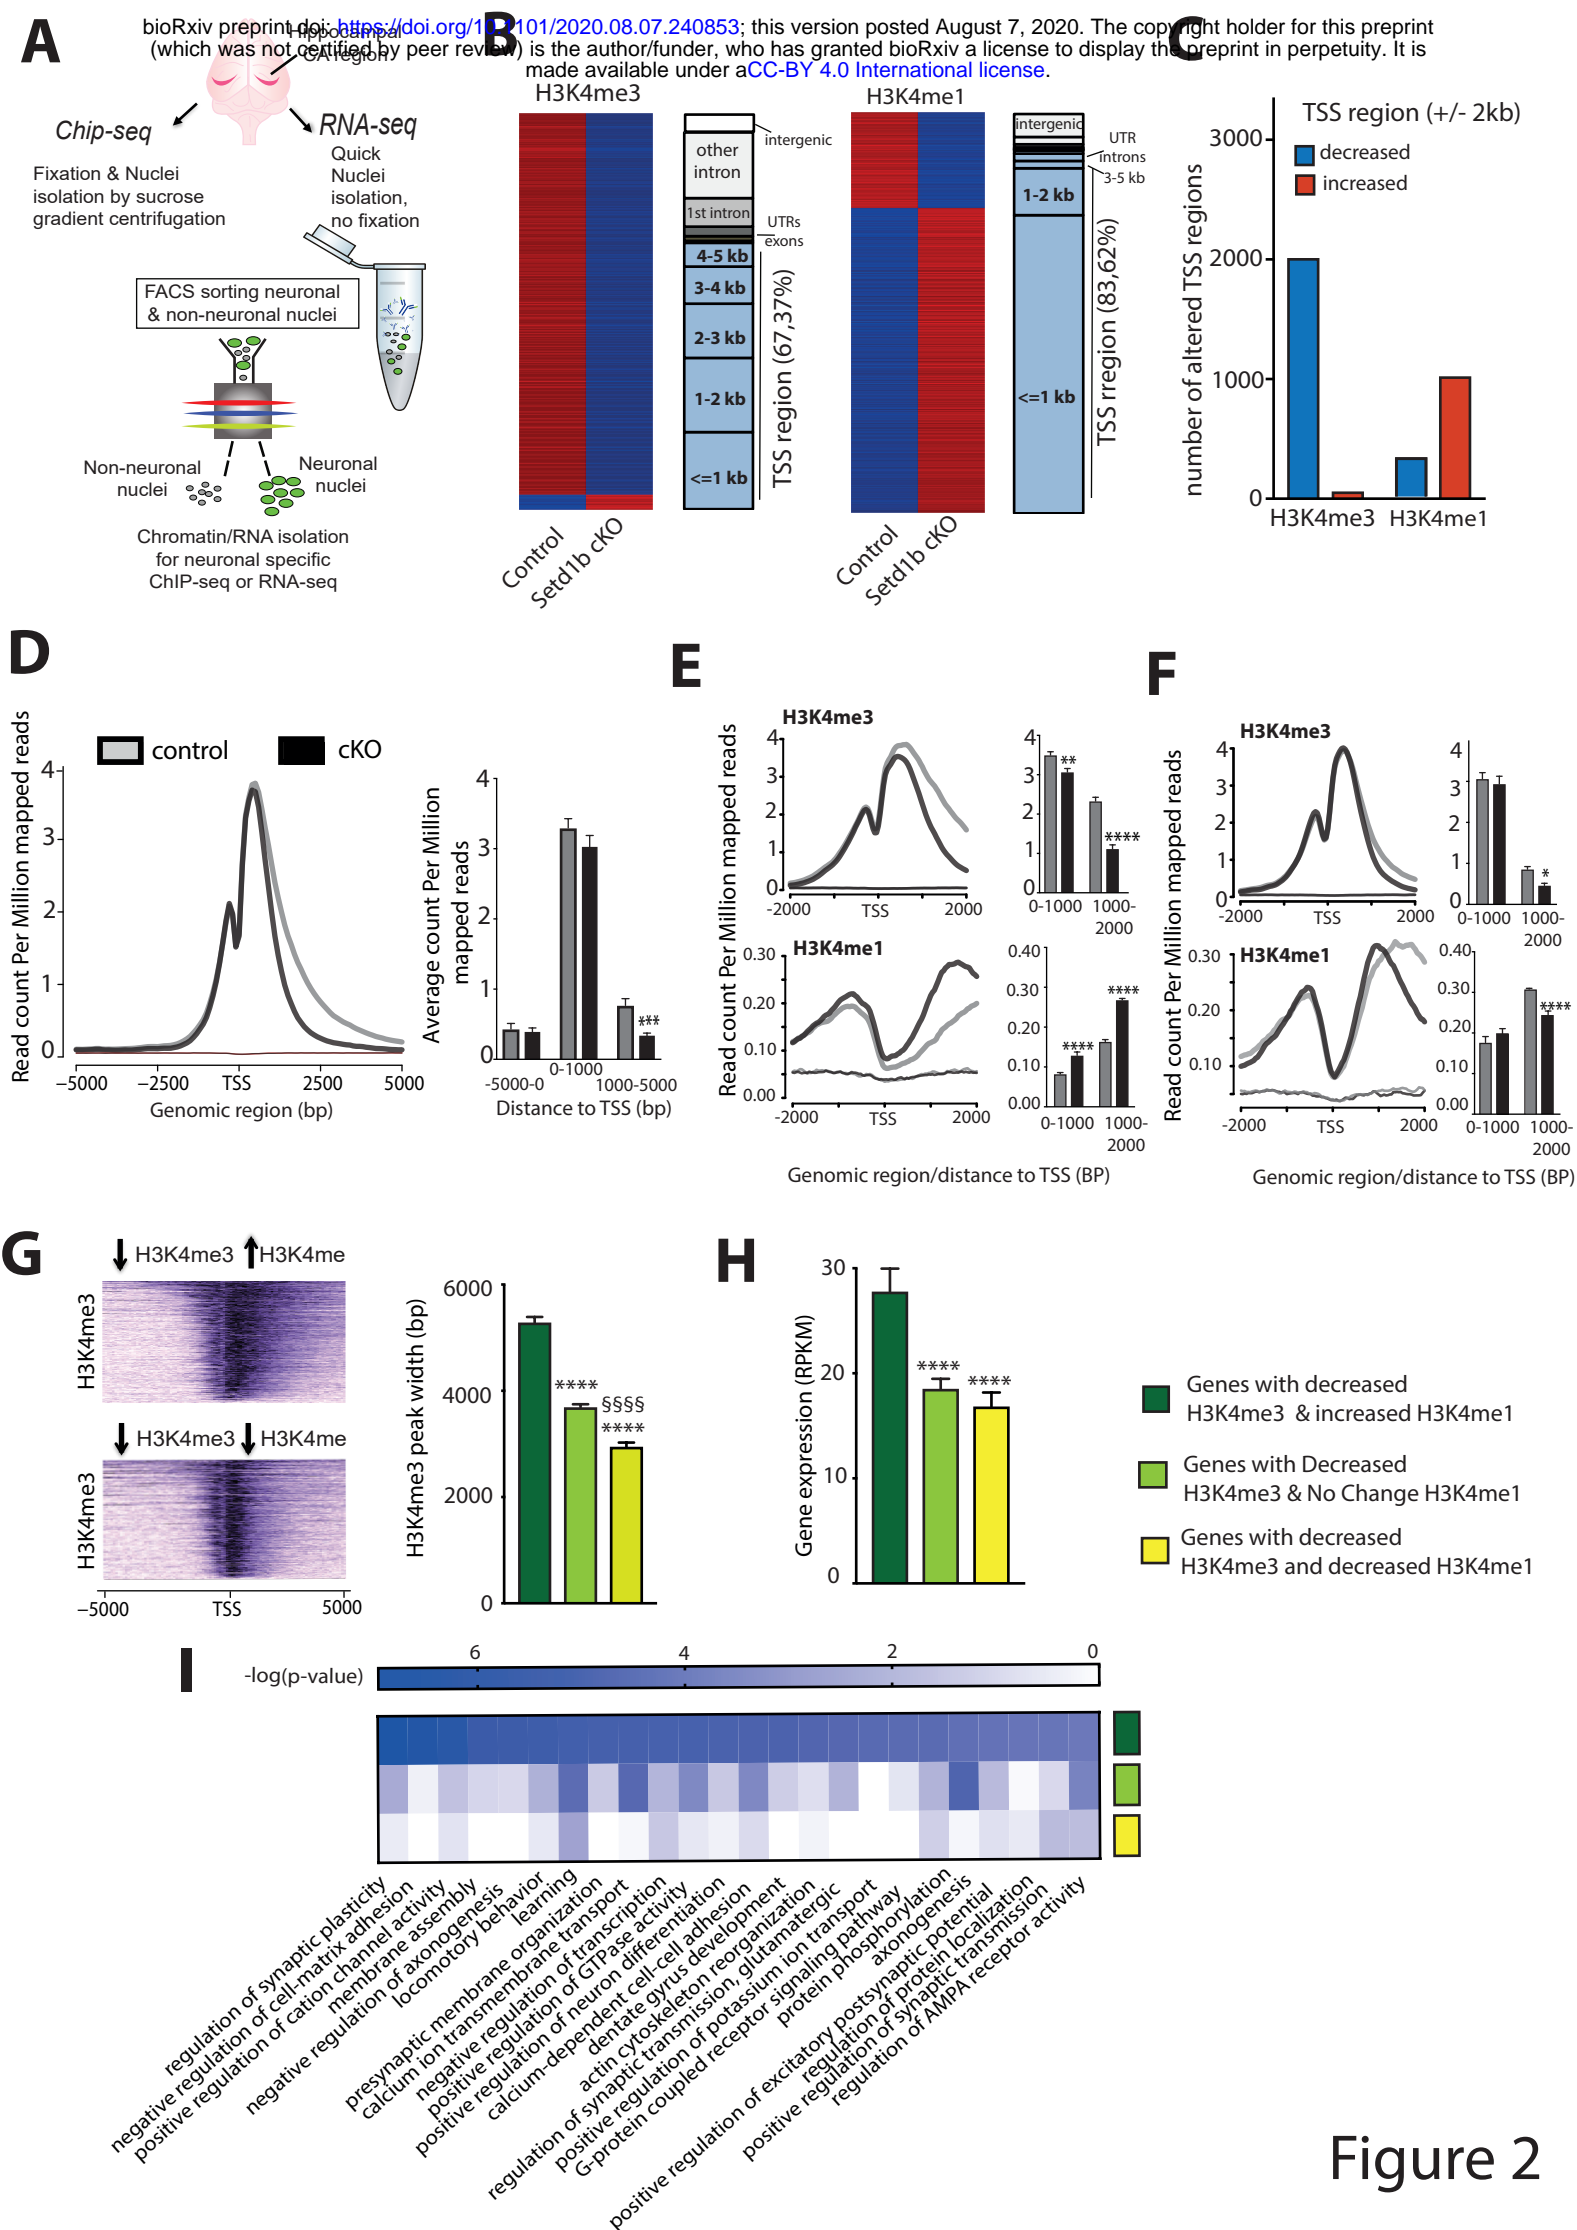

Figure 2



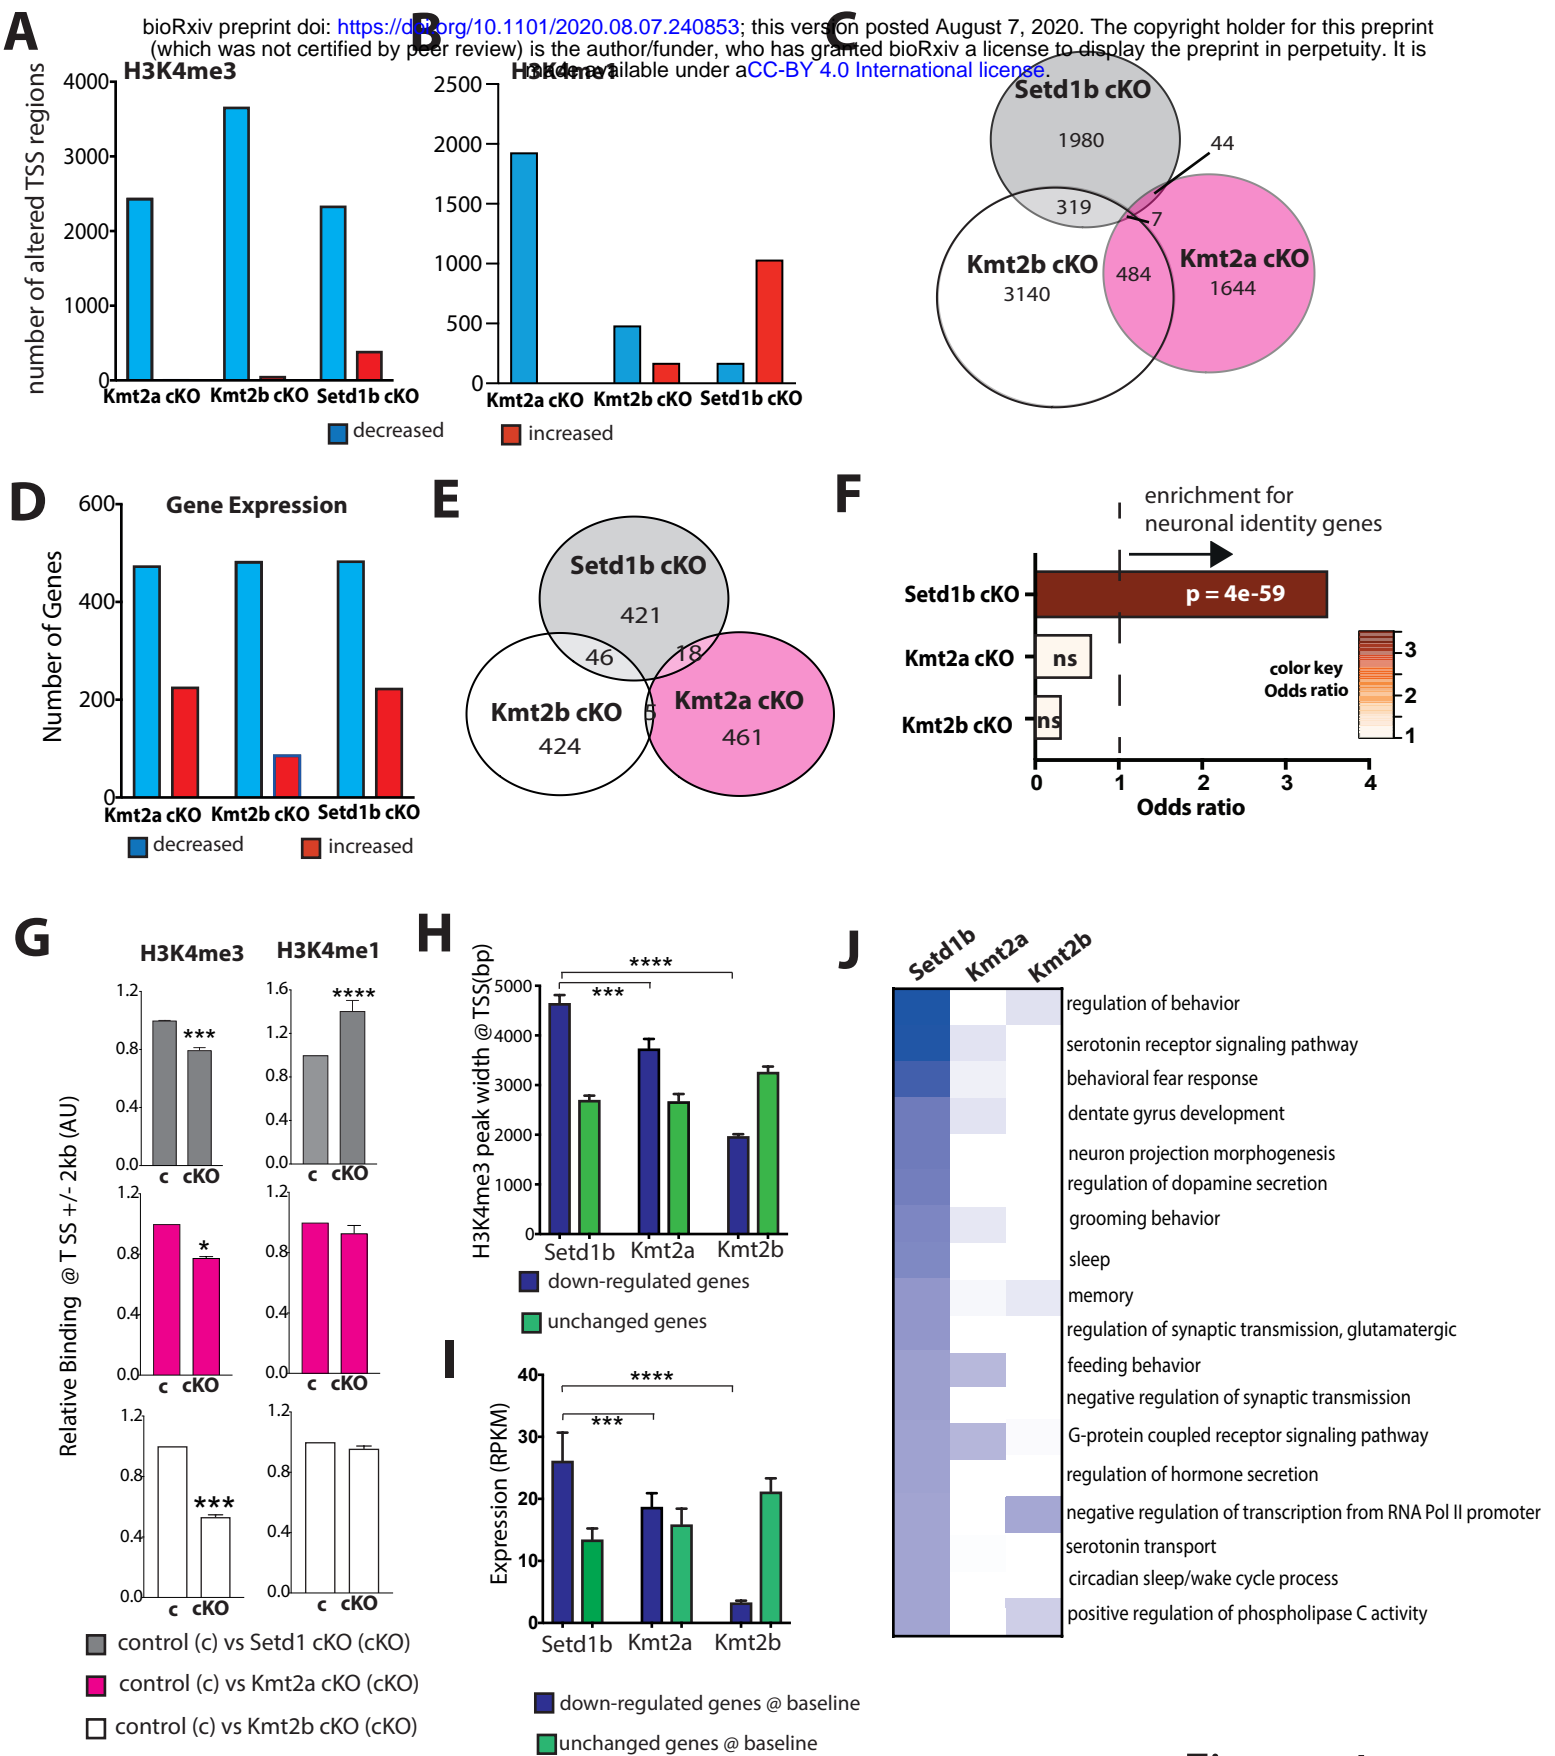

Figure 4

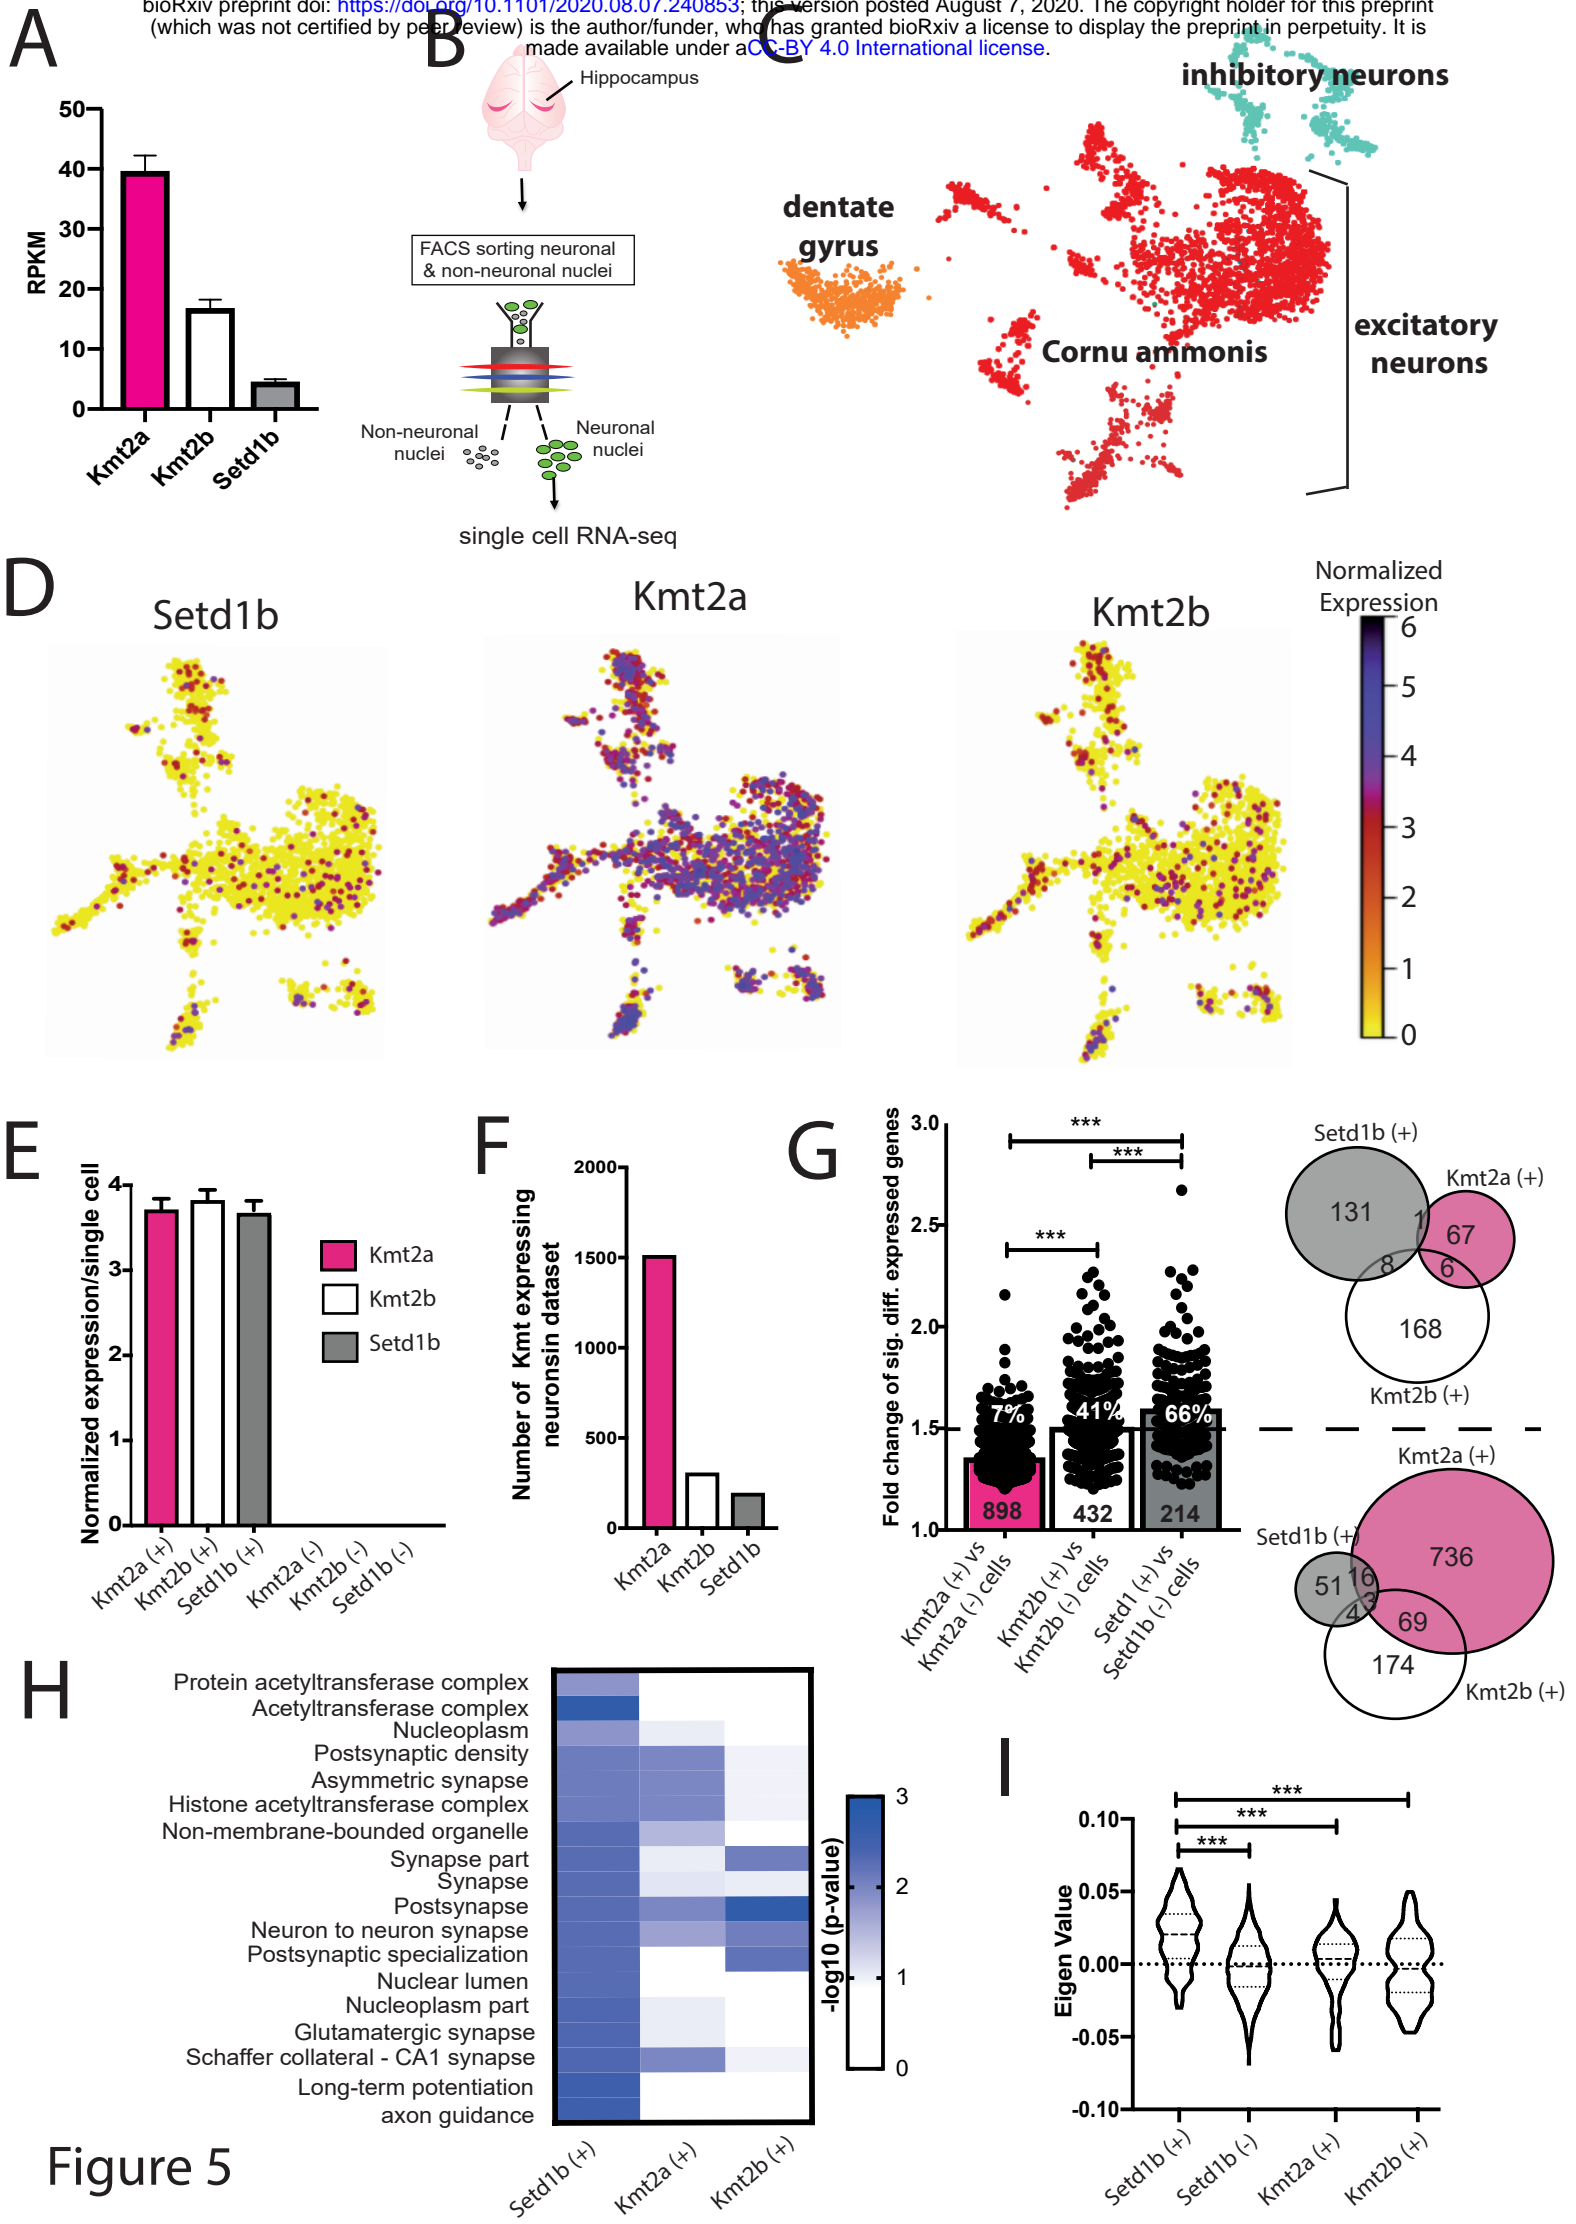

Figure 5

Expanded view Fig. 1.

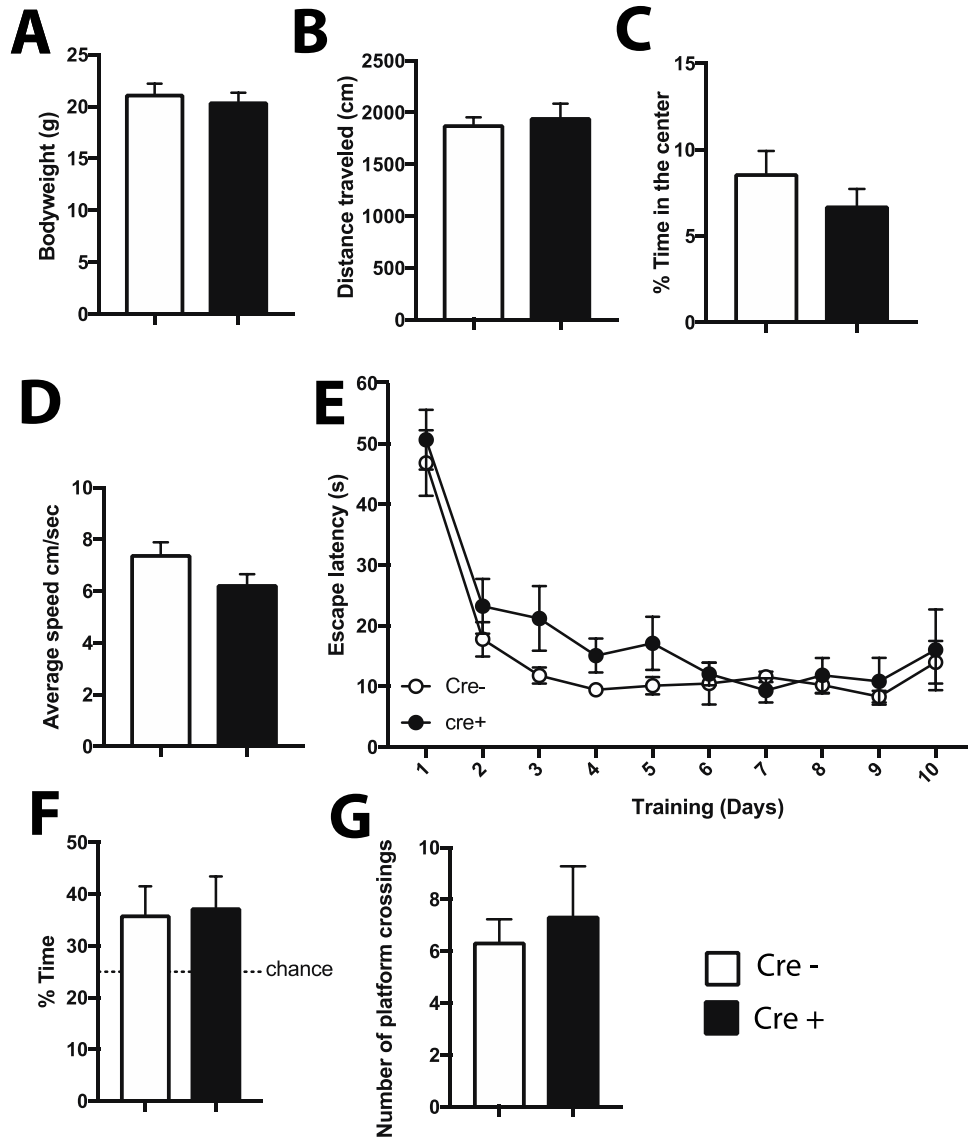

**Expanded view Fig 1. Behavioral analysis of mice expressing CamKII-driven Cre recombinase.**

**A.** Transgenic mice expressing CRE under control of the CamKII promoter were subjected to behavior testing (n=8, Cre +) comparing them to wild type mice from the same breeding colony that did not express CRE (n=8; Cre -). No difference was observed in body weight. **B.** The distance traveled in the open field test and **(C)** the time spent in the center of the arena was similar amongst groups. **D.** No difference in the swimming speed was observed amongst groups when subjected to the water maze test. **E.** Escape latency during water maze training was similar in CRE - and CRE + mice. **F.** During the probe test performed after 10 trainings days, CRE - and CRE + mice showed similar performance then time spent in the target quadrant and **(G)** the number of platform crossings were analyzed. Error bars indicate SEM.

Expanded view Fig 2.

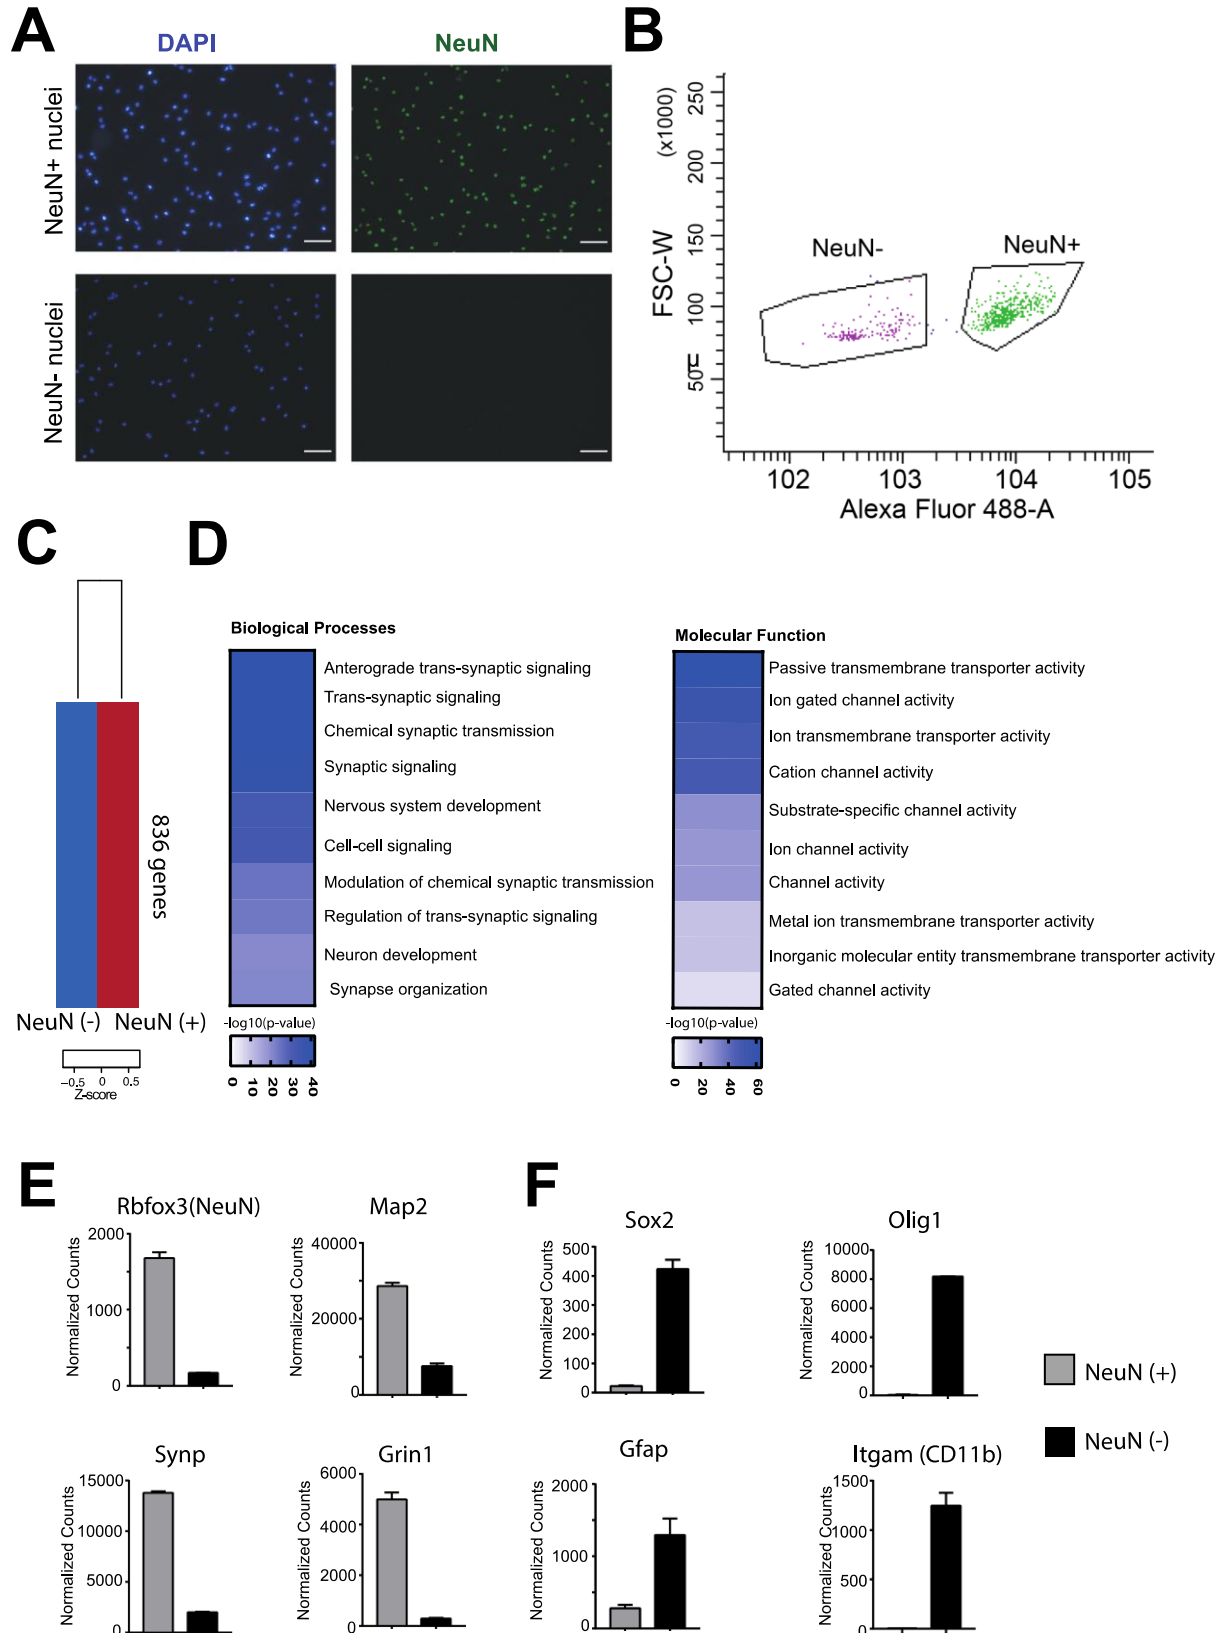

**Expanded view Fig 2: Sorting neuronal and non-neuronal nuclei for RNA-analysis.** Nuclei from the hippocampal CA region were subjected to FACS as depicted in Fig 2A. **A.** Representative images showing nuclei that were sorted using the neuronal marker NeuN. Note that no NeuN positive nuclei are detected in the NeuN (-) fraction confirming the purity of the approach. Scale bar: 50µm **C.** Gating strategy for NeuN (+) and NeuN (-) nuclei sorting. **C.** RNA-sequencing (n=2/group) was



performed from NeuN (+) and NeuN (-) nuclei and a differential expression analysis was performed. Heat map shows 836 genes specifically enriched in NeuN (+) nuclei when compared to NeuN (-) nuclei. The criteria to select those genes were: adjusted p value <0.01, basemean >150, fold change > 5. **D.** GO-term analysis showing that the top 10 enriched biological processes and molecular functions for the 836 genes enriched in NeuN (+) nuclei all represent specific neuronal processes. **E.** Normalized expression values obtained from the RNA-seq experiment showing the expression of selected genes known to be enriched in neurons. **F.** Normalized expression values of genes that are known to be enriched in non-neuronal cells including glia cells. Error bars indicate SEM.

Expanded view Fig. 3.

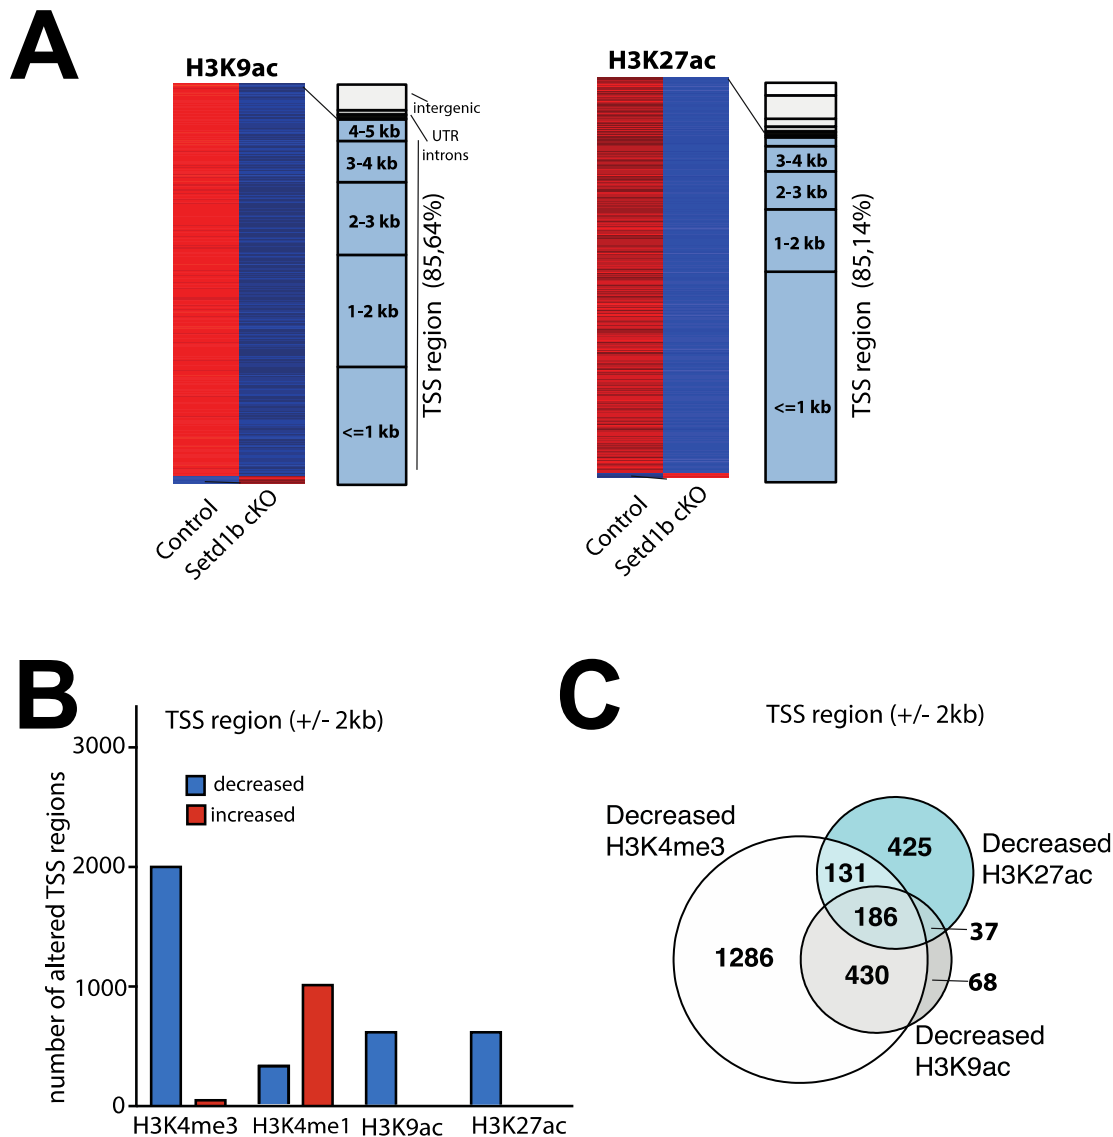

**Expanded view Fig. 3. Decreased H3K9ac and H3K27ac in *Setd1b* cKO mice.** **A.** Left panel: Heat map showing genes with differential H3K9ac sites at the TSS in neuronal nuclei from *Setd1b* cKO mice and their genomic location. Right panel shows the same analysis for H3K27ac. **B.** Bar chart showing the number of genes with decreased and increased H3K9ac and H3K27ac marks at the TSS region. Data for H3K4me3 and H3K4me1 are shown for comparison. As expected, the most affected histone-mark is H3K4me3. **C.** Venn diagram showing that most of the sites exhibiting decreased H3K9ac at the TSS also exhibit reduced H3K4me3, while this was not the case for H3K27ac. TSS, transcription start site.

**Expanded view Fig. 4.**

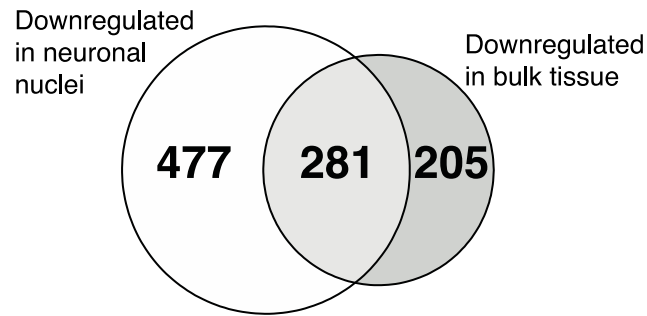

**Expanded view Fig 4. Comparison of gene-expression changes in *Setd1b* cKO mice detected from cell-type specific and bulk tissue RNA-seq.** Venn diagram showing the overlap of genes downregulated in *Setd1b* cKO mice detected via RNA-seq from neuronal nuclei or bulk hippocampal CA tissue. Please note that more genes are detected when neuronal nuclei are analyzed suggesting that some of the difference are masked by cell type heterogeneity when bulk tissue is analyzed.

### Expanded view Fig. 5

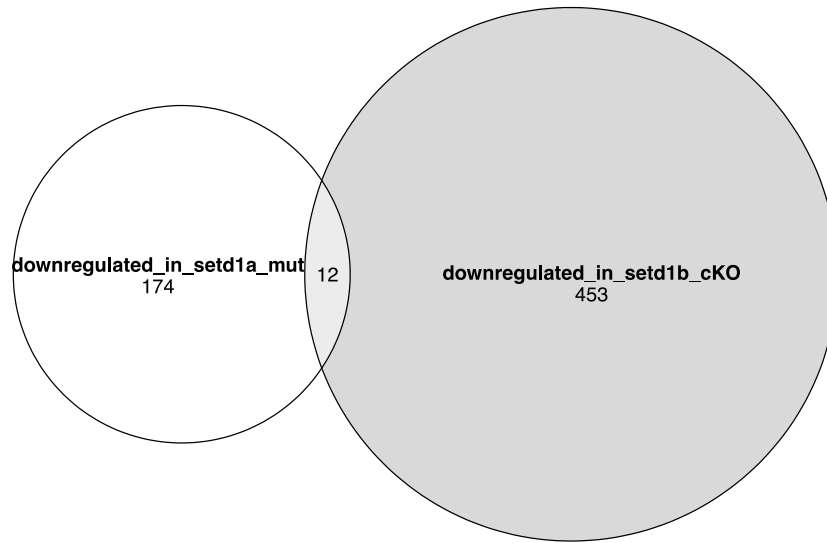

**Expanded view Fig. 5. Comparison of the genes down-regulated in *Setd1A* and *Setd1b* mutant mice.** Venn diagram showing genes down-regulated in *Setd1A* vs *Setd1b* cKO mice. Please note that genes affected in the different mutant mice are very different. Of course, care has to be taken since the data from *Setd1A* mutant mice stems from a recent publication by Mukai et al., 2019 (PMID:31606247). In this study cortical tissue from heterozygous mice constitutively lacking *Setd1A* were analyzed, while our data stems from the hippocampus of conditional knock out mice.

Expanded view Fig 6.

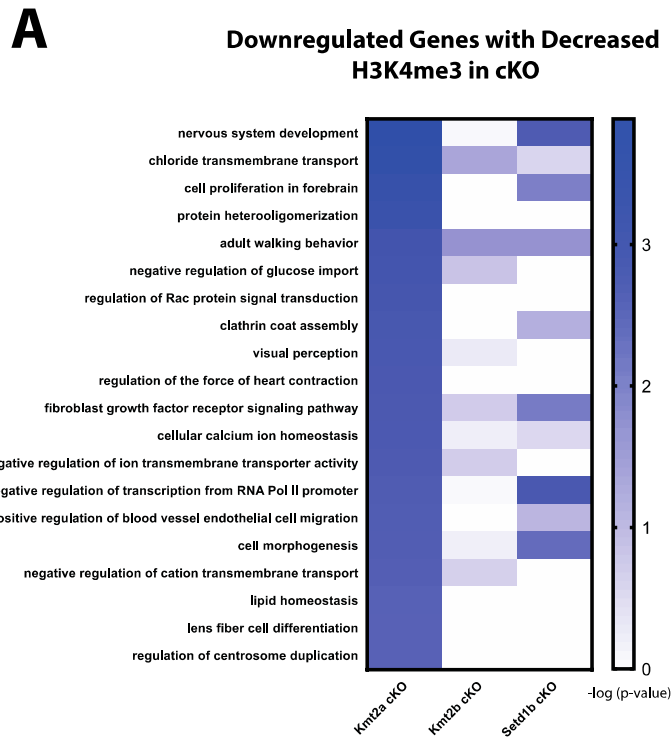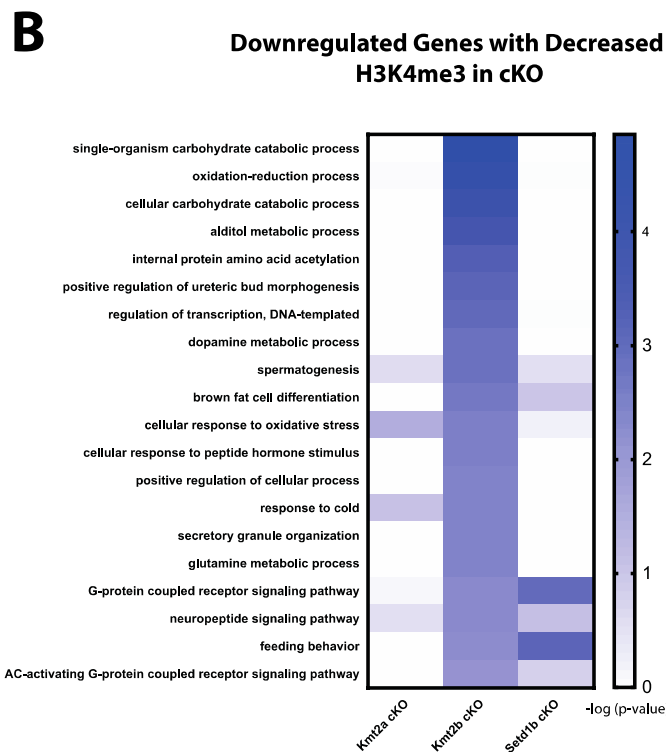

**Expanded view Fig. 6. Functional pathways affected in *Kmt2a* and *Kmt2b* cKO mice. A.** Heat map showing functional pathways analysis for genes down-regulated in *Kmt2a* cKO mice. Enrichment of the same pathways is also shown for *Kmt2b* and *Setd1b* cKO mice. **B.** Heat map showing functional pathways analysis for genes down-regulated in *Kmt2b* cKO mice. Enrichment of the same pathways is also show for *Kmt2a* and *Setd1b* cKO mice. Please note that the pathways affected in *Kmt2a* or *Kmt2b* cKO mice differ substantially from those affected in *Setd1b* cKO mice. All data is based on comparable RNA-seq data generated from bulk hippocampal CA1 region.

### Expanded view Fig 7.

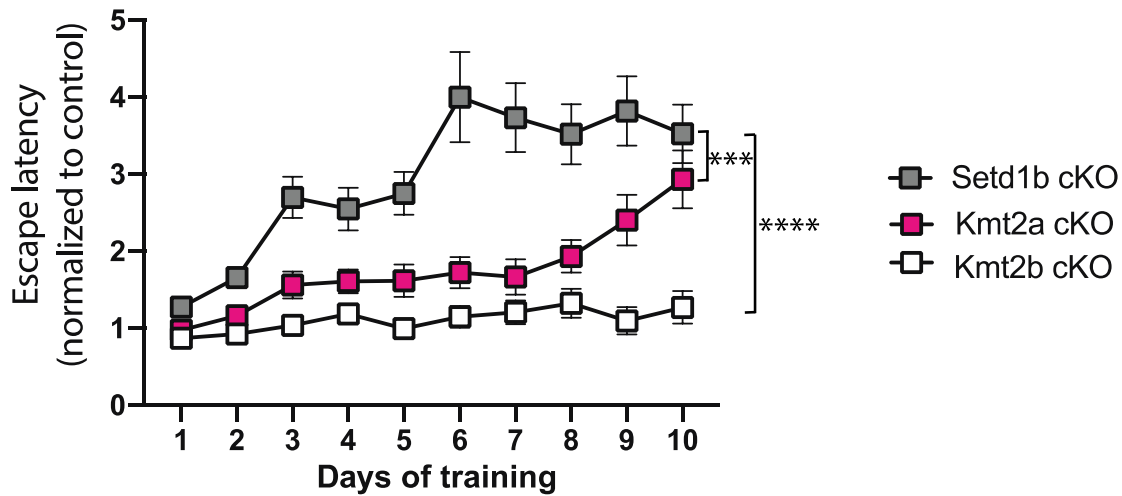

**Expanded view Fig. 7. Spatial reference learning in *Kmt2a*, *Kmt2b* and *Setd1b* cKO mice.** To compare spatial reference learning in the 3 different mutant mice, we normalized the data to the corresponding control group. This is important, since the experiments were performed at different time points. The data on *Kmt2a* and *Kmt2b* cKO mice was generated in our laboratory and is already published {Kerimoglu, 2013} {Kerimoglu, 2017}. The data on *Setd1b* cKO mice were generated as part of this project using the same protocol. In this plot an increase in the normalized escape latency shows the difference to the corresponding control group. Hence a higher normalized escape latency indicates a greater difference to the corresponding control and this more severe learning impairment. This difference in normalized escape latency is significantly greater in *Setd1b* cKO mice when compared to *Kmt2a* or *Kmt2b* cKO mice. It is interesting to note that the degree of memory impairment seems to parallel the gene-expression data, hence *Setd1* appears to be most important for the expression of neuronal identity genes linked to learning and memory *Setd1b* cKO mice are also most affected in spatial memory formation. Loss of *Kmt2a* affects some pathways specific to neuronal function but also more general cellular processes while loss of *Kmt2b* seem to affect genes that are not specific to neuronal function. In line with this, loss of *Kmt2b* has the least effect on spatial memory and in fact memory defects in *Kmt2b* cKO mice only become obvious during prolonged training and the probe test<sup>23</sup>. *Setd1b* cKO (n = 14) vs *Kmt2a* cKO (n = 13): Repeated measures ANOVA, genotype effect:  $F(1,25) = 16.83$ , \*\*\*  $p$ -value < 0.001. *Setd1b* cKO (n = 14) vs *Kmt2b* cKO (n = 22): Repeated measures ANOVA, genotype effect:  $F(1,34) = 70.66$ , \*\*\*\*  $p$ -value < 0.0001.
